# Supplementary material for: Clusters of Conserved Beta Cell Marker Genes for Assessment of Beta Cell Phenotype
Source: PubMed Central journal article supplement (PMC3166300; doi:10.1371/journal.pone.0024134), 2011-09-02
Supplement: pone.0024134.s005.pdf [file pone.0024134.s005.pdf]

Tissue-conserved, beta cell-abundant transcripts

| symbol  | cluster | probe set    | gene (Rat)                                                         | Accession | av FC | Beta score | probe set   | Accession | av FC | Beta score | probe set    | Accession | av FC | Beta score |
|---------|---------|--------------|--------------------------------------------------------------------|-----------|-------|------------|-------------|-----------|-------|------------|--------------|-----------|-------|------------|
| AACS    | B       | 1368126_at   | acetoacetyl-CoA synthetase                                         | NM_023104 | 2.1   | 4          | 218434_s_at | NM_023928 | 1.2   | 10         | 1451116_at   | BC026817  | 4.837 | 17         |
| ACBD3   | C       | 1372552_at   | acyl-Coenzyme A binding domain containing 3                        | AI102273  | 2.05  | 6          | 202324_s_at | NM_022735 | 2.28  | 14         | 1456316_a_at | BI965035  | 2.798 | 17         |
| ACBD3   | C       | 1372552_at   | acyl-Coenzyme A binding domain containing 3                        | AI102273  | 2.05  | 6          | 202323_s_at | AI636775  | 1.7   | 14         | 1452137_at   | BB704602  | 2.283 | 13         |
| ACBD3   | C       | 1372552_at   | acyl-Coenzyme A binding domain containing 3                        | AI102273  | 2.05  | 6          | 202323_s_at | AI636775  | 1.7   | 14         | 1426635_at   | BB704602  | 1.803 | 13         |
| ACBD3   | C       | 1372552_at   | acyl-Coenzyme A binding domain containing 3                        | AI102273  | 2.05  | 6          | 202323_s_at | AI636775  | 1.7   | 14         | 1428668_at   | BI790311  | 1.591 | 15         |
| ACLY    | C       | 1367854_at   | ATP citrate lyase                                                  | NM_016987 | 2.91  | 2          | 201127_s_at | AI971281  | 2.43  | 14         | 1446315_at   | BB261367  | 6.284 | 17         |
| ACLY    | C       | 1367854_at   | ATP citrate lyase                                                  | NM_016987 | 2.91  | 2          | 201128_s_at | NM_001096 | 3.79  | 14         | 1438389_x_at | BB424434  | 2.938 | 17         |
| ACLY    | C       | 1367854_at   | ATP citrate lyase                                                  | NM_016987 | 2.91  | 2          | 210337_s_at | U18197    | 4.94  | 14         | 1439445_x_at | AV347837  | 1.746 | 13         |
| ACLY    | C       | 1367854_at   | ATP citrate lyase                                                  | NM_016987 | 2.91  | 2          | 201128_s_at | NM_001096 | 3.79  | 14         | 1451666_at   | BI456232  | 2.52  | 17         |
| ACLY    | C       | 1367854_at   | ATP citrate lyase                                                  | NM_016987 | 2.91  | 2          | 201128_s_at | NM_001096 | 3.79  | 14         | 1439459_x_at | BB276877  | 1.902 | 17         |
| ADRA2A  |         | 1387708_at   | adrenergic receptor, alpha 2a                                      | U79031    | 2.64  | 6          | 209869_at   | AF284095  | 1.22  | 8          | 1423022_at   | NM_007417 | 2.889 | 17         |
| AGA     | C       | 1372421_at   | aspartylglucosaminidase (predicted)                                | AA943766  | 2.72  | 6          | 204332_s_at | M64073    | 1.53  | 12         | 1434665_at   | AV052058  | 3.899 | 17         |
| AGA     | C       | 1372421_at   | aspartylglucosaminidase (predicted)                                | AA943766  | 2.72  | 6          | 204333_s_at | NM_000027 | 1.67  | 14         | 1434665_at   | AV052058  | 3.899 | 17         |
| AGA     | C       | 1372421_at   | aspartylglucosaminidase (predicted)                                | AA943766  | 2.72  | 6          | 216064_s_at | W27131    | 3.12  | 14         | 1434665_at   | AV052058  | 3.899 | 17         |
| AMPD2   | C       | 1372782_a_at | similar to adenosine monophosphate deaminase 2 (isoform L)         | BE111787  | 1.88  | 4          | 212360_at   | AI916249  | 1.76  | 10         | 1438128_at   | BB427907  | 8.87  | 17         |
| AMPD2   | C       | 1372782_a_at | similar to adenosine monophosphate deaminase 2 (isoform L)         | BE111787  | 1.88  | 4          | 212360_at   | AI916249  | 1.76  | 10         | 1438941_x_at | AV330806  | 2.884 | 15         |
| AMPD2   | C       | 1372782_a_at | similar to adenosine monophosphate deaminase 2 (isoform L)         | BE111787  | 1.88  | 4          | 212360_at   | AI916249  | 1.76  | 10         | 1426757_at   | AK004759  | 2.263 | 17         |
| AP3B2   | A       | 1376844_at   | adaptor-related protein complex 3, beta 2 subunit (predicted)      | BI298352  | 1.44  | 2          | 205678_at   | NM_004644 | 1.2   | 8          | 1451837_at   | BC024722  | 2.044 | 17         |
| AP3B2   | A       | 1376844_at   | adaptor-related protein complex 3, beta 2 subunit (predicted)      | BI298352  | 1.44  | 2          | 205678_at   | NM_004644 | 1.2   | 8          | 1426927_at   | AB030202  | 1.991 | 15         |
| AP3B2   | A       | 1376844_at   | adaptor-related protein complex 3, beta 2 subunit (predicted)      | BI298352  | 1.44  | 2          | 205678_at   | NM_004644 | 1.2   | 8          | 1445224_at   | BI134892  | 1.858 | 13         |
| AP3D1   |         | 1375444_at   | adaptor-related protein complex 3, delta subunit (predicted)       | BF409829  | 1.6   | 6          | 210974_s_at | AF130042  | 1.21  | 10         | 1417964_at   | NM_007460 | 1.579 | 15         |
| AP3D1   |         | 1367549_a_at | adaptor-related protein complex 3, delta subunit (predicted)       | BI282757  | 1.37  | 0          | 208710_s_at | AI424923  | 1.2   | 8          | 1417964_at   | NM_007460 | 1.579 | 15         |
| APLP1   | A       | 1371572_at   | amyloid beta (A4) precursor protein                                | BM986220  | 1.35  | -2         | 209462_at   | U48437    | 6.71  | 8          | 1435857_s_at | AI848048  | 3.641 | 15         |
| APLP1   | A       | 1371571_at   | amyloid beta (A4) precursor protein                                | BM986220  | 1.4   | 0          | 209462_at   | U48437    | 6.71  | 8          | 1416134_at   | NM_007467 | 1.909 | 15         |
| ARCN1   | C       | 1398896_at   | archain                                                            | AA892567  | 1.61  | 6          | 201176_s_at | NM_001655 | 1.75  | 14         | 1423743_at   | BC017124  | 2.415 | 15         |
| ARCN1   | C       | 1398896_at   | archain                                                            | AA892567  | 1.61  | 6          | 201176_s_at | NM_001655 | 1.75  | 14         | 1451089_a_at | BC017124  | 1.806 | 17         |
| ARCN1   | C       | 1398896_at   | archain                                                            | AA892567  | 1.61  | 6          | 201176_s_at | NM_001655 | 1.75  | 14         | 1436062_at   | BB757123  | 1.763 | 15         |
| ARF4    | C       | 1398758_at   | ADP-ribosylation factor 4                                          | NM_024151 | 2.02  | 6          | 201096_s_at | AL537042  | 1.94  | 10         | 1434074_x_at | BB754834  | 3.116 | 17         |
| ARF4    | C       | 1398758_at   | ADP-ribosylation factor 4                                          | NM_024151 | 2.02  | 6          | 201097_s_at | NM_001660 | 1.69  | 12         | 1434074_x_at | BB754834  | 3.116 | 17         |
| ARFIP1  | C       | 1369026_at   | ADP-ribosylation factor interacting protein 1                      | NM_021763 | 2.2   | 6          | 218230_at   | AL044651  | 1.86  | 14         | 1454916_s_at | AV087417  | 1.733 | 15         |
| ARFIP1  | C       | 1369026_at   | ADP-ribosylation factor interacting protein 1                      | NM_021763 | 2.2   | 6          | 214483_s_at | AF124489  | 1.5   | 12         | 1454916_s_at | AV087417  | 1.733 | 15         |
| ARHGAP1 | C       | 1393113_at   | Rho GTPase activating protein 1 (predicted)                        | AA957578  | 1.88  | 4          | 202117_at   | BG468434  | 1.51  | 10         | 1458118_at   | AV233159  | 2.512 | 17         |
| CD164   | C       | 1386886_at   | CD164 antigen                                                      | NM_031812 | 2.35  | 6          | 208654_s_at | BF669455  | 2.26  | 14         | 1416440_at   | NM_016898 | 1.794 | 17         |
| ARHGEF9 |         | 1377216_at   | Cdc42 guanine nucleotide exchange factor (GEF) 9                   | BI295997  | 1.77  | 0          | 203263_s_at | AI625739  | 1.49  | 10         | 1436577_at   | BB380620  | 3.924 | 17         |
| ARHGEF9 |         | 1377216_at   | Cdc42 guanine nucleotide exchange factor (GEF) 9                   | BI295997  | 1.77  | 0          | 203263_s_at | AI625739  | 1.49  | 10         | 1436258_at   | BE651574  | 3.665 | 15         |
| ARMCX2  |         | 1373156_at   | armadillo repeat containing, X-linked 2                            | AI385330  | 4.91  | 4          | 203404_at   | NM_014782 | 2.05  | 14         | 1456739_x_at | BB392869  | 3.011 | 15         |
| ARMCX2  |         | 1373156_at   | armadillo repeat containing, X-linked 2                            | AI385330  | 4.91  | 4          | 203404_at   | NM_014782 | 2.05  | 14         | 1437849_x_at | BB443695  | 2.746 | 15         |
| ARMCX2  |         | 1373156_at   | armadillo repeat containing, X-linked 2                            | AI385330  | 4.91  | 4          | 203404_at   | NM_014782 | 2.05  | 14         | 1415780_a_at | NM_026139 | 1.953 | 13         |
| ARMCX3  | A       | 1373958_at   | armadillo repeat containing, X-linked 3 (similar to ALEX3 protein) | AA943149  | 1.82  | 6          | 217858_s_at | NM_016607 | 1.29  | 10         | 1424373_at   | AK004598  | 3.482 | 17         |
| ARMET   | C       | 1372352_at   | arginine-rich, mutated in early stage tumors (predicted)           | AI170666  | 3.46  | 6          | 202655_at   | NM_006010 | 1.89  | 14         | 1428112_at   | AK014338  | 1.999 | 17         |
| ASAH1   | C       | 1369077_at   | N-acylsphingosine amidohydrolase 1                                 | NM_053407 | 2.61  | 6          | 210980_s_at | U47674    | 1.61  | 8          | 1416735_at   | NM_019734 | 2.675 | 17         |
| ASAH1   | C       | 1374770_at   | N-acylsphingosine amidohydrolase 1                                 | AA800062  | 2.22  | 6          | 213702_x_at | AI934569  | 1.56  | 10         | 1416735_at   | NM_019734 | 2.675 | 17         |
| ATF2    | C       | 1369472_a_at | activating transcription factor 2                                  | NM_031018 | 1.98  | 6          | 212984_at   | BE786164  | 2.13  | 12         | 1452116_s_at | BM119623  | 1.691 | 15         |
| ATF3    | B       | 1369268_at   | activating transcription factor 3                                  | NM_012912 | 7.46  | 4          | 202672_s_at | NM_001674 | 9.16  | 10         | 1449363_at   | BC019946  | 11.24 | 17         |

|                 |   |              |                                                                     |           |      |   |             |           |      |    |              |           |       |    |
|-----------------|---|--------------|---------------------------------------------------------------------|-----------|------|---|-------------|-----------|------|----|--------------|-----------|-------|----|
| <b>ATF4</b>     | C | 1367624_at   | activating transcription factor 4                                   | NM_024403 | 2.54 | 6 | 200779_at   | NM_001675 | 1.27 | 8  | 1448135_at   | M94087    | 1.798 | 15 |
| <b>ATP2A2</b>   | C | 1369065_a_at | ATPase, Ca++ transporting, cardiac muscle, slow twitch 2            | NM_017290 | 2.4  | 4 | 209186_at   | M23114    | 1.71 | 8  | 1416551_at   | NM_009722 | 2.461 | 13 |
| <b>ATP2A2</b>   | C | 1370426_a_at | ATPase, Ca++ transporting, cardiac muscle, slow twitch 2            | J04024    | 2.56 | 6 | 209186_at   | M23114    | 1.71 | 8  | 1427250_at   | AA245637  | 2.08  | 17 |
| <b>ATP2A3</b>   | C | 1368477_at   | ATPase, Ca++ transporting, ubiquitous                               | NM_012914 | 10.1 | 6 | 207522_s_at | NM_005173 | 5.44 | 14 | 1450124_a_at | NM_016745 | 2.63  | 13 |
| <b>ATP2A3</b>   | C | 1368477_at   | ATPase, Ca++ transporting, ubiquitous                               | NM_012914 | 10.1 | 6 | 213036_x_at | Y15724    | 3.91 | 14 | 1450124_a_at | NM_016745 | 2.63  | 13 |
| <b>ATP2A3</b>   | C | 1368477_at   | ATPase, Ca++ transporting, ubiquitous                               | NM_012914 | 10.1 | 6 | 207521_s_at | AF068220  | 2.88 | 14 | 1450124_a_at | NM_016745 | 2.63  | 13 |
| <b>ATP2A3</b>   | C | 1371165_a_at | ATPase, Ca++ transporting, ubiquitous                               | AF458230  | 6.39 | 6 | 213042_s_at | AA877910  | 3.35 | 14 | 1450124_a_at | NM_016745 | 2.63  | 13 |
| <b>ATP6V1B2</b> | A | 1387664_at   | ATPase, H+ transporting, V1 subunit B, isoform 2                    | NM_057213 | 2.46 | 2 | 201089_at   | NM_001693 | 2.47 | 10 | 1446465_at   | BB500880  | 1.77  | 17 |
| <b>ATP6V1B2</b> | A | 1371402_at   | ATPase, H+ transporting, V1 subunit B, isoform 2                    | BM390600  | 2.16 | 2 | 201089_at   | NM_001693 | 2.47 | 10 | 1446465_at   | BB500880  | 1.77  | 17 |
| <b>ATP6V1C1</b> | A | 1374396_at   | ATPase, H+ transporting, V1 subunit C, isoform 1 (predicted)        | BI293306  | 2.02 | 4 | 202872_at   | AW024925  | 1.77 | 10 | 1419546_at   | AA987147  | 1.631 | 15 |
| <b>BACE1</b>    | A | 1369256_at   | beta-site APP cleaving enzyme                                       | NM_019204 | 1.46 | 6 | 217904_s_at | NM_012104 | 2.21 | 10 | 1421825_at   | AF200346  | 4.681 | 17 |
| <b>BACE1</b>    | A | 1369256_at   | beta-site APP cleaving enzyme                                       | NM_019204 | 1.46 | 6 | 217904_s_at | NM_012104 | 2.21 | 10 | 1455826_a_at | BB114336  | 3.043 | 17 |
| <b>BEXL1</b>    | A | 1373458_at   | Brain expressed X-linked 4                                          | BI289546  | 6.38 | 4 | 218332_at   | NM_018476 | 7.43 | 12 | 1428209_at   | AK010400  | 4.119 | 17 |
| <b>BEXL1</b>    | A | 1373458_at   | Brain expressed X-linked 4                                          | BI289546  | 6.38 | 4 | 215440_s_at | AL523320  | 3.27 | 12 | 1428209_at   | AK010400  | 4.119 | 17 |
| <b>BICD1</b>    | C | 1373902_at   | Bicaudal D homolog 1 (Drosophila) (predicted)                       | AI230054  | 1.83 | 6 | 214806_at   | U90030    | 1.4  | 8  | 1437548_at   | AV367839  | 6.374 | 17 |
| <b>BICD1</b>    | C | 1373902_at   | Bicaudal D homolog 1 (Drosophila) (predicted)                       | AI230054  | 1.83 | 6 | 214806_at   | U90030    | 1.4  | 8  | 1438701_at   | BB130665  | 2.79  | 15 |
| <b>BICD1</b>    | C | 1373902_at   | Bicaudal D homolog 1 (Drosophila) (predicted)                       | AI230054  | 1.83 | 6 | 214806_at   | U90030    | 1.4  | 8  | 1442298_at   | AI426427  | 2.117 | 17 |
| <b>BICD1</b>    | C | 1373902_at   | Bicaudal D homolog 1 (Drosophila) (predicted)                       | AI230054  | 1.83 | 6 | 214806_at   | U90030    | 1.4  | 8  | 1451684_a_at | BC016192  | 1.803 | 15 |
| <b>BTG2</b>     | B | 1386995_at   | B-cell translocation gene 2, anti-proliferative                     | BI288701  | 4.46 | 4 | 201235_s_at | BG339064  | 4.38 | 14 | 1448272_at   | NM_007570 | 2.977 | 13 |
| <b>BTG2</b>     | B | 1386994_at   | B-cell translocation gene 2, anti-proliferative                     | BI288701  | 2.22 | 4 | 201236_s_at | NM_006763 | 2.96 | 14 | 1416250_at   | NM_007570 | 5.667 | 17 |
| <b>CACNA1A</b>  | A | 1367821_a_at | calcium channel, voltage-dependent, P/Q type, alpha 1A subunit      | BF400631  | 1.44 | 6 | 214933_at   | AA769818  | 2.29 | 8  | 1459996_at   | AI848293  | 3.153 | 17 |
| <b>CACNA1A</b>  | A | 1367821_a_at | calcium channel, voltage-dependent, P/Q type, alpha 1A subunit      | BF400631  | 1.44 | 6 | 214933_at   | AA769818  | 2.29 | 8  | 1450510_a_at | AB066608  | 1.911 | 15 |
| <b>CACNA1D</b>  | A | 1370640_a_at | calcium channel, voltage-dependent, L type, alpha 1D subunit        | AF370009  | 1.58 | 6 | 210108_at   | BE550599  | 5.53 | 14 | 1427974_s_at | BB048682  | 3.773 | 17 |
| <b>CACNA1D</b>  | A | 1370640_a_at | calcium channel, voltage-dependent, L type, alpha 1D subunit        | AF370009  | 1.58 | 6 | 207998_s_at | NM_000720 | 1.56 | 14 | 1427974_s_at | BB048682  | 3.773 | 17 |
| <b>CACNB2</b>   | A | 1388023_a_at | calcium channel, voltage-dependent, beta 2 subunit                  | AF394941  | 1.45 | 4 | 213714_at   | AI040163  | 1.7  | 8  | 1444693_at   | BG069383  | 4.709 | 17 |
| <b>CACNB2</b>   | A | 1370178_at   | calcium channel, voltage-dependent, beta 2 subunit                  | BG373973  | 3.03 | 6 | 213714_at   | AI040163  | 1.7  | 8  | 1456401_at   | BB078175  | 2.511 | 13 |
| <b>CADM1</b>    |   | 1370594_at   | immunoglobulin superfamily, member 1                                | AF322217  | 1.35 | 4 | 207695_s_at | NM_001555 | 1.22 | 10 | 1447702_x_at | AV152162  | 5.647 | 15 |
| <b>CADM1</b>    |   | 1370410_at   | immunoglobulin superfamily, member 1                                | AF322216  | 1.74 | 2 | 207695_s_at | NM_001555 | 1.22 | 10 | 1438589_at   | BB023061  | 1.902 | 17 |
| <b>CADPS</b>    | A | 1368523_at   | Ca<2+-dependent activator protein for secretion                     | NM_013219 | 4.97 | 2 | 204814_at   | NM_003716 | 6.22 | 14 | 1445586_at   | BB283411  | 6.856 | 17 |
| <b>CADPS</b>    | A | 1368523_at   | Ca<2+-dependent activator protein for secretion                     | NM_013219 | 4.97 | 2 | 204814_at   | NM_003716 | 6.22 | 14 | 1448955_s_at | NM_012061 | 3.46  | 13 |
| <b>CADPS</b>    | A | 1368523_at   | Ca<2+-dependent activator protein for secretion                     | NM_013219 | 4.97 | 2 | 204814_at   | NM_003716 | 6.22 | 14 | 1458298_at   | AI462674  | 3.21  | 13 |
| <b>CAMKK2</b>   |   | 1368753_at   | calcium/calmodulin-dependent protein kinase kinase 2, beta          | NM_031338 | 1.43 | 6 | 207359_at   | NM_006549 | 1.65 | 14 | 1424476_at   | BI157430  | 3.018 | 15 |
| <b>CANX</b>     | C | 1371687_at   | calnexin                                                            | AA848326  | 2.29 | 6 | 208853_s_at | L18887    | 2.51 | 14 | 1428935_at   | AI988026  | 3.552 | 17 |
| <b>CANX</b>     | C | 1371686_at   | calnexin                                                            | AA848326  | 1.9  | 6 | 208852_s_at | AI761759  | 2.18 | 14 | 1428935_at   | AI988026  | 3.552 | 17 |
| <b>CANX</b>     | C | 1388442_at   | calnexin                                                            | AA848326  | 2.19 | 6 | 200068_s_at | M94859    | 1.32 | 10 | 1428935_at   | AI988026  | 3.552 | 17 |
| <b>CCDC6</b>    |   | 1372134_at   | coiled-coil-helix-coiled-coil-helix domain containing 6 (predicted) | AW918650  | 1.55 | 6 | 204716_at   | NM_005436 | 1.62 | 12 | 1423779_at   | BC011331  | 1.989 | 15 |
| <b>CCPG1</b>    | B | 1375027_at   | Cell cycle progression 1 (predicted)                                | AI407365  | 1.9  | 6 | 222156_x_at | AK022459  | 3.38 | 14 | 1424420_at   | BC006717  | 2.791 | 17 |
| <b>CCPG1</b>    | B | 1375027_at   | Cell cycle progression 1 (predicted)                                | AI407365  | 1.9  | 6 | 221511_x_at | AB033080  | 2.15 | 14 | 1420127_s_at | C85100    | 3.918 | 17 |
| <b>CCPG1</b>    | B | 1375027_at   | Cell cycle progression 1 (predicted)                                | AI407365  | 1.9  | 6 | 221156_x_at | NM_004748 | 1.81 | 14 | 1420127_s_at | C85100    | 3.918 | 17 |
| <b>CD164</b>    |   | 1386886_at   | CD164 antigen                                                       | NM_031812 | 2.35 | 6 | 208405_s_at | NM_006016 | 1.62 | 10 | 1416440_at   | NM_016898 | 1.794 | 17 |
| <b>CDK2AP1</b>  |   | 1375326_at   | CDK2 (cyclin-dependent kinase 2)-associated protein 1 (predicted)   | AI602458  | 2.37 | 6 | 201938_at   | NM_004642 | 1.51 | 10 | 1458451_at   | BE985383  | 3.259 | 17 |
| <b>CHGA</b>     | B | 1387235_at   | chromogranin A                                                      | NM_021655 | 14.3 | 4 | 204697_s_at | NM_001275 | 18.2 | 14 | 1418149_at   | NM_007693 | 25.11 | 17 |
| <b>CHM</b>      |   | 1369227_at   | choroideremia                                                       | NM_017067 | 2.4  | 6 | 207099_s_at | NM_000390 | 1.5  | 14 | 1448712_at   | NM_018818 | 2.281 | 17 |
| <b>CHM</b>      |   | 1373802_at   | Choroideremia                                                       | BF392902  | 2.15 | 6 | 207099_s_at | NM_000390 | 1.5  | 14 | 1448712_at   | NM_018818 | 2.281 | 17 |
| <b>CHST3</b>    |   | 1369512_at   | carbohydrate (chondroitin 6/keratan) sulfotransferase 3             | NM_053408 | 1.51 | 6 | 208252_s_at | NM_004273 | 1.2  | 10 | 1460322_at   | NM_016803 | 2.43  | 17 |
| <b>CKAP4</b>    |   | 1375654_at   | cytoskeleton-associated protein 4 (predicted)                       | BI278813  | 1.41 | 6 | 200999_s_at | NM_006825 | 1.85 | 8  | 1426755_at   | BB312117  | 2.106 | 13 |
| <b>CLCN3</b>    | B | 1392453_at   | chloride channel 3                                                  | AI763523  | 1.74 | 0 | 201735_s_at | NM_001829 | 2.89 | 14 | 1416610_a_at | NM_007711 | 1.967 | 13 |
| <b>CLCN3</b>    | B | 1380547_at   | chloride channel 3                                                  | BI288519  | 1.82 | 0 | 201734_at   | AI760629  | 2.43 | 14 | 1416610_a_at | NM_007711 | 1.967 | 13 |
| <b>CLCN3</b>    | B | 1380547_at   | chloride channel 3                                                  | BI288519  | 1.82 | 0 | 201732_s_at | AF029346  | 1.98 | 14 | 1416610_a_at | NM_007711 | 1.967 | 13 |
| <b>CLCN3</b>    | B | 1380547_at   | chloride channel 3                                                  | BI288519  | 1.82 | 0 | 201733_at   | AA902971  | 1.77 | 10 | 1416610_a_at | NM_007711 | 1.967 | 13 |

|         |                |                                                                        |                     |      |   |             |           |      |    |              |           |       |    |
|---------|----------------|------------------------------------------------------------------------|---------------------|------|---|-------------|-----------|------|----|--------------|-----------|-------|----|
| CNOT2   | 1376067_at     | CCR4-NOT transcription complex, subunit 2                              | AA800637            | 1.5  | 4 | 222181_at   | BG105204  | 1.3  | 14 | 1447212_at   | BB165759  | 2.197 | 17 |
| COPA    | 1388377_at     | coatamer protein complex subunit alpha (predicted)                     | AW142717            | 1.91 | 6 | 214336_s_at | AI621079  | 1.33 | 8  | 1437274_at   | BM204808  | 3.998 | 17 |
| COPA    | 1388377_at     | coatamer protein complex subunit alpha (predicted)                     | AW142717            | 1.91 | 6 | 214336_s_at | AI621079  | 1.33 | 8  | 1415706_at   | BQ175820  | 1.619 | 17 |
| COPB2   | C 1367454_at   | coatamer protein complex, subunit beta 2 (beta prime)                  | NM_021765           | 1.88 | 6 | 201098_at   | NM_004766 | 1.85 | 14 | 1456175_a_at | AV109541  | 1.69  | 17 |
| COPG    | 1372464_at     | coatamer protein complex, subunit gamma                                | BE109050            | 2.1  | 6 | 217749_at   | NM_016128 | 1.4  | 12 | 1416017_at   | BC024686  | 2.018 | 15 |
| COPG    | 1371810_at     | Coatamer protein complex, subunit gamma                                | BF284093            | 1.39 | 4 | 217749_at   | NM_016128 | 1.4  | 12 | 1415670_at   | BC024686  | 2.364 | 15 |
| COX15   | C 1377444_at   | COX15 homolog, cytochrome c oxidase assembly protein (yeast)           | BE120680            | 1.77 | 6 | 221550_at   | BC002382  | 1.15 | 14 | 1426693_x_at | BC021498  | 2.671 | 17 |
| COX15   | C 1377444_at   | COX15 homolog, cytochrome c oxidase assembly protein (yeast)           | BE120680            | 1.77 | 6 | 221550_at   | BC002382  | 1.15 | 14 | 1452146_a_at | BC021498  | 1.564 | 15 |
| CPE     | B 1386921_at   | carboxypeptidase E                                                     | NM_013128           | 12.3 | 6 | 201116_s_at | AI922855  | 7.13 | 14 | 1415949_at   | BC010197  | 3.248 | 15 |
| CPE     | B 1386921_at   | carboxypeptidase E                                                     | NM_013128           | 12.3 | 6 | 201117_s_at | NM_001873 | 6.85 | 14 | 1415949_at   | BC010197  | 3.248 | 15 |
| CPEB1   | 1392996_at     | cytoplasmic polyadenylation element binding protein 1 (predicted)      | BG668435            | 2.18 | 6 | 219578_s_at | NM_030594 | 1.27 | 10 | 1417960_at   | NM_007755 | 8.554 | 17 |
| CPLX2   | A 1368584_a_at | complexin 2                                                            | NM_053878           | 1.63 | 2 | 206368_at   | NM_006650 | 2.59 | 14 | 1421477_at   | NM_009946 | 3.797 | 15 |
| CPLX2   | A 1368584_a_at | complexin 2                                                            | NM_053878           | 1.63 | 2 | 206368_at   | NM_006650 | 2.59 | 14 | 1455672_s_at | BE946238  | 2.065 | 15 |
| CRMP1   | A 1387899_at   | collapsin response mediator protein 1                                  | U52102              | 3.51 | 0 | 202517_at   | NM_001313 | 1.81 | 8  | 1448289_at   | AB006714  | 2.205 | 13 |
| CRYZ    | 1374628_at     | crystallin, zeta (predicted)                                           | AI232098            | 1.38 | 4 | 202950_at   | NM_001889 | 3.03 | 10 | 1430546_at   | AK010433  | 1.905 | 15 |
| CTNNA1  | C 1371921_at   | catenin (cadherin-associated protein), alpha 1, 102kDa                 | BM986272            | 1.88 | 6 | 200765_x_at | NM_001903 | 1.6  | 8  | 1443662_at   | BE989574  | 3.473 | 17 |
| CTNNA1  | C 1371921_at   | catenin (cadherin-associated protein), alpha 1, 102kDa                 | BM986272            | 1.88 | 6 | 200764_s_at | AI826881  | 1.54 | 8  | 1443662_at   | BE989574  | 3.473 | 17 |
| CYB561  | 1398383_at     | cytochrome b-561 (predicted)                                           | BI282164            | 1.5  | 4 | 209163_at   | AL514271  | 2.34 | 14 | 1417507_at   | BC006732  | 2.049 | 11 |
| CYB561  | 1398383_at     | cytochrome b-561 (predicted)                                           | BI282164            | 1.5  | 4 | 209164_s_at | BC002976  | 1.23 | 12 | 1417507_at   | BC006732  | 2.049 | 11 |
| DAAM1   | 1389318_at     | Dishevelled associated activator of morphogenesis 1 (predicted)        | BF282986            | 1.36 | 4 | 216060_s_at | AK021890  | 1.97 | 12 | 1431035_at   | AW988556  | 2.658 | 17 |
| DACH1   | B 1384907_at   | similar to dachshund homolog 1 (Drosophila)                            | not on RG230A array |      |   | 205471_s_at | AW772082  | 3.46 | 14 | 1433743_at   | BG075820  | 3.216 | 17 |
| DAD1    | C 1367465_at   | defender against cell death 1                                          | AI013627            | 2.1  | 6 | 200046_at   | NM_001344 | 1.61 | 14 | 1454860_x_at | BI966630  | 3.403 | 17 |
| DAD1    | C 1367465_at   | defender against cell death 1                                          | AI013627            | 2.1  | 6 | 200046_at   | NM_001344 | 1.61 | 14 | 1418528_a_at | NM_010015 | 1.975 | 17 |
| DCX     | A 1374966_at   | doublecortin                                                           | BE109057            | 12   | 6 | 204850_s_at | NM_000555 | 1.69 | 12 | 1418139_at   | BB418548  | 29.54 | 17 |
| DCX     | A 1374966_at   | doublecortin                                                           | BE109057            | 12   | 6 | 204850_s_at | NM_000555 | 1.69 | 12 | 1418141_at   | BB418548  | 9.299 | 17 |
| DCX     | A 1374966_at   | doublecortin                                                           | BE109057            | 12   | 6 | 204851_s_at | AF040254  | 2.46 | 12 | 1448974_at   | BB418548  | 2.602 | 15 |
| DDIT3   | A 1369590_a_at | DNA-damage inducible transcript 3                                      | NM_024134           | 9.57 | 6 | 209383_at   | BC003637  | 1.95 | 14 | 1417516_at   | NM_007837 | 3.35  | 17 |
| DDIT3   | A 1376178_at   | DNA-damage inducible transcript 3                                      | BF403703            | 7.01 | 4 | 209383_at   | BC003637  | 1.95 | 14 | 1443897_at   | BB200603  | 2.104 | 15 |
| DDOST   | C 1372247_at   | dolichyl-di-phosphooligosaccharide-protein glycotransferase (predictec | BF282907            | 2.63 | 6 | 208674_x_at | BC002594  | 1.91 | 12 | 1416493_at   | NM_007838 | 2.059 | 17 |
| DDOST   | C 1372247_at   | dolichyl-di-phosphooligosaccharide-protein glycotransferase (predictec | BF282907            | 2.63 | 6 | 208675_s_at | D29643    | 1.84 | 14 | 1416493_at   | NM_007838 | 2.059 | 17 |
| DDR1    | B 1370216_at   | discoidin domain receptor family, member 1                             | L26525              | 1.76 | 2 | 210749_x_at | L11315    | 4.37 | 14 | 1459990_at   | BF462661  | 7.157 | 17 |
| DDR1    | B 1370216_at   | discoidin domain receptor family, member 1                             | L26525              | 1.76 | 2 | 207169_x_at | NM_001954 | 5.07 | 14 | 1439382_x_at | BB378700  | 2.187 | 15 |
| DDR1    | B 1370216_at   | discoidin domain receptor family, member 1                             | L26525              | 1.76 | 2 | 208779_x_at | L20817    | 4.73 | 14 | 1439382_x_at | BB378700  | 2.187 | 15 |
| DDX50   | 1390688_at     | DEAD (Asp-Glu-Ala-Asp) box polypeptide 50 (predicted)                  | AA799576            | 1.55 | 2 | 221699_s_at | AF334103  | 1.71 | 12 | 1439082_at   | AA518255  | 3.026 | 17 |
| DDX50   | 1390688_at     | DEAD (Asp-Glu-Ala-Asp) box polypeptide 50 (predicted)                  | AA799576            | 1.55 | 2 | 221699_s_at | AF334103  | 1.71 | 12 | 1417875_at   | NM_053183 | 2.205 | 17 |
| DDX6    | 1398945_at     | DEAD (Asp-Glu-Ala-Asp/His) box polypeptide 6 (mapped)                  | AA851439            | 1.48 | 4 | 204909_at   | NM_004397 | 1.27 | 14 | 1424598_at   | BC021452  | 6.716 | 17 |
| DDX6    | 1398945_at     | DEAD (Asp-Glu-Ala-Asp/His) box polypeptide 6 (mapped)                  | AA851439            | 1.48 | 4 | 204909_at   | NM_004397 | 1.27 | 14 | 1447789_x_at | BB150520  | 3.517 | 17 |
| DLG5    | 1377121_at     | Discs, large homolog 5 (Drosophila) (predicted)                        | AW520410            | 2.01 | 6 | 201681_s_at | AB011155  | 1.58 | 12 | 1431187_s_at | BF140264  | 2.872 | 13 |
| DNAJB9  | B 1387116_at   | DnaJ (Hsp40) homolog, subfamily B, member 9                            | NM_012699           | 3.87 | 6 | 202843_at   | NM_012328 | 3.68 | 14 | 1417191_at   | NM_013760 | 1.903 | 13 |
| DNAJB9  | B 1387116_at   | DnaJ (Hsp40) homolog, subfamily B, member 9                            | NM_012699           | 3.87 | 6 | 202842_s_at | AL080081  | 2.83 | 14 | 1417191_at   | NM_013760 | 1.903 | 13 |
| DNAJC1  | 1376079_at     | DnaJ (Hsp40) homolog, subfamily C, member 1 (predicted)                | BI295806            | 1.83 | 4 | 218409_s_at | NM_022365 | 1.59 | 12 | 1459791_at   | AV129500  | 2.56  | 17 |
| DNM1L   | C 1369220_at   | dynamamin 1-like                                                       | NM_053655           | 1.36 | 2 | 203105_s_at | NM_012062 | 1.4  | 8  | 1428008_at   | BC027538  | 5.16  | 17 |
| DNM1L   | C 1388022_a_at | dynamamin 1-like                                                       | AF132727            | 1.43 | 2 | 203105_s_at | NM_012062 | 1.4  | 8  | 1428087_at   | BM249101  | 1.591 | 15 |
| DPH4    | C 1390168_a_at | DPH4, JJJ3 homolog (S. cerevisiae) (zinc finger, CSL-type containing   | BI289564            | 2.92 | 6 | 213853_at   | AL050199  | 1.68 | 12 | 1451389_at   | AY028460  | 10.74 | 17 |
| DPH4    | C 1390168_a_at | DPH4, JJJ3 homolog (S. cerevisiae) (zinc finger, CSL-type containing   | BI289564            | 2.92 | 6 | 213853_at   | AL050199  | 1.68 | 12 | 1430718_s_at | AV313469  | 7.305 | 17 |
| DST     | 1375357_at     | dystonia 1                                                             | BE112237            | 1.35 | 4 | 220154_at   | NM_020388 | 1.36 | 10 | 1450119_at   | NM_010081 | 2.144 | 13 |
| DSTN    | C 1371375_at   | destrin                                                                | BI285599            | 2.79 | 6 | 201021_s_at | BF697964  | 1.58 | 10 | 1439535_at   | BB204161  | 2.742 | 17 |
| DSTN    | C 1375881_at   | destrin                                                                | AI170442            | 2.41 | 6 | 201021_s_at | BF697964  | 1.58 | 10 | 1439535_at   | BB204161  | 2.742 | 17 |
| DYNC2L1 | C 1387782_at   | dynein light chain-2                                                   | NM_080697           | 1.65 | 6 | 203762_s_at | NM_016008 | 1.33 | 10 | 1428446_at   | AK008822  | 2.038 | 17 |
| DYNLT1  | 1388903_at     | T-complex associated-testis-expressed 1-like (Protein 91/23)           | AI179335            | 1.51 | 4 | 201999_s_at | NM_006519 | 1.66 | 8  | 1420614_at   | NM_025975 | 1.846 | 15 |

|         |   |              |                                                                            |                       |      |   |             |           |      |    |              |           |       |    |
|---------|---|--------------|----------------------------------------------------------------------------|-----------------------|------|---|-------------|-----------|------|----|--------------|-----------|-------|----|
| DYNLT1  |   | 1388903_at   | T-complex associated-testis-expressed 1-like (Protein 91/23)               | AI179335              | 1.51 | 4 | 201999_s_at | NM_006519 | 1.66 | 8  | 1449928_at   | NM_025975 | 1.767 | 15 |
| EBAG9   | C | 1391510_at   | estrogen receptor-binding fragment-associated gene 9 (predicted)           | BF398331              | 1.7  | 6 | 204274_at   | AA812215  | 1.86 | 14 | 1422669_at   | AY009091  | 1.607 | 13 |
| EBAG9   | C | 1391510_at   | estrogen receptor-binding fragment-associated gene 9 (predicted)           | BF398331              | 1.7  | 6 | 204278_s_at | NM_004215 | 1.27 | 8  | 1422669_at   | AY009091  | 1.607 | 13 |
| ECHDC1  | C | 1374585_at   | enoyl Coenzyme A hydratase domain containing 1                             | AW915152              | 1.7  | 4 | 219974_x_at | NM_018479 | 1.2  | 8  | 1425001_at   | BC023104  | 1.523 | 17 |
| EFCBP2  | A | 1368443_at   | EF hand calcium binding protein 2                                          | NM_133415             | 1.73 | 6 | 215005_at   | AV723666  | 1.29 | 10 | 1418881_at   | NM_054095 | 5.643 | 17 |
| EGR4    | B | 1387442_at   | early growth response 4                                                    | NM_019137             | 7.92 | 2 | 207767_s_at | NM_001965 | 2.18 | 14 | 1449977_at   | NM_020596 | 4.169 | 17 |
| EGR4    | B | 1375784_at   | Early growth response 4                                                    | BF412806              | 1.37 | 6 | 207768_at   | NM_001965 | 34.1 | 14 | 1449977_at   | NM_020596 | 4.169 | 17 |
| EIF3S10 | C | 1389968_at   | eukaryotic translation initiation factor 3, subunit 10 (theta) (predicted) | BG376953              | 1.38 | 4 | 200596_s_at | BE614908  | 1.27 | 14 | 1416661_at   | AW701127  | 8.263 | 17 |
| EIF3S10 | C | 1389968_at   | eukaryotic translation initiation factor 3, subunit 10 (theta) (predicted) | BG376953              | 1.38 | 4 | 200595_s_at | NM_003750 | 1.65 | 12 | 1416660_at   | AW701127  | 1.907 | 13 |
| ELAVL4  | A | 1389975_at   | ELAV (embryonic lethal, abnormal vision, Drosophila)-like 4 (Hu antigen)   | BE116949              | 2.23 | 4 | 206051_at   | NM_021952 | 3.69 | 10 | 1428741_at   | AK013588  | 6.031 | 15 |
| ELAVL4  | A | 1389975_at   | ELAV (embryonic lethal, abnormal vision, Drosophila)-like 4 (Hu antigen)   | BE116949              | 2.23 | 4 | 206051_at   | NM_021952 | 3.69 | 10 | 1450258_a_at | NM_010488 | 3.83  | 15 |
| ELAVL4  | A | 1389975_at   | ELAV (embryonic lethal, abnormal vision, Drosophila)-like 4 (Hu antigen)   | BE116949              | 2.23 | 4 | 206051_at   | NM_021952 | 3.69 | 10 | 1452894_at   | AK013588  | 3.563 | 15 |
| ELAVL4  | A | 1389975_at   | ELAV (embryonic lethal, abnormal vision, Drosophila)-like 4 (Hu antigen)   | BE116949              | 2.23 | 4 | 206051_at   | NM_021952 | 3.69 | 10 | 1457399_at   | BB211758  | 2.708 | 17 |
| ELMO3   |   | 1374995_at   | engulfment and cell motility 3, ced-12 homolog (C. elegans) (predicted)    | BI291645              | 3.9  | 4 | 219411_at   | NM_024712 | 1.43 | 10 | 1434489_at   | AI481208  | 2.041 | 17 |
| EPB41L3 | A | 1370503_s_at | erythrocyte protein band 4.1-like 3                                        | BM383451              | 3.08 | 4 | 206710_s_at | NM_012307 | 2.14 | 10 | 1440595_at   | BB036542  | 7.606 | 17 |
| EPB41L3 | A | 1368515_at   | erythrocyte protein band 4.1-like 3                                        | NM_053927             | 2.52 | 4 | 212681_at   | AI770004  | 3.1  | 14 | 1426010_a_at | AF177146  | 4.595 | 15 |
| ERO1L   | B | 1389297_at   | ERO1-like (S. cerevisiae)                                                  | AI146215              | 2.61 | 6 | 218498_s_at | NM_014584 | 1.41 | 12 | 1449324_at   | BM234652  | 2.092 | 13 |
| ERO1LB  | B |              | ERO1-like beta (S. cerevisiae)                                             | not on RG230.20 array |      |   | 220012_at   | NM_019891 | 14   | 14 | 1449948_at   | NM_026184 | 18.01 | 17 |
| ERO1LB  | B |              | ERO1-like beta (S. cerevisiae)                                             | not on RG230.20 array |      |   | 220012_at   | NM_019891 | 14   | 14 | 1434714_at   | BB234316  | 18.2  | 17 |
| ERO1LB  | B |              | ERO1-like beta (S. cerevisiae)                                             | not on RG230.20 array |      |   | 220012_at   | NM_019891 | 14   | 14 | 1425705_a_at | AF489856  | 12.61 | 17 |
| ERP29   | C | 1387031_at   | endoplasmic reticulum protein 29                                           | U36482                | 2.23 | 6 | 201216_at   | NM_006817 | 2.41 | 14 | 1453634_a_at | AK013303  | 6.92  | 17 |
| FBXL15  | C | 1374114_at   | F-box and leucine-rich repeat protein 15 (predicted)                       | BI282971              | 1.86 | 6 | 218938_at   | NM_024326 | 1.71 | 12 | 1417855_at   | NM_133694 | 5.81  | 17 |
| FIP1L1  | C | 1389621_at   | FIP1 like 1 (S. cerevisiae) (predicted)                                    | BE113454              | 1.45 | 4 | 221007_s_at | NM_030917 | 1.43 | 8  | 1428280_at   | BM199874  | 3.019 | 17 |
| FIP1L1  | C | 1389621_at   | FIP1 like 1 (S. cerevisiae) (predicted)                                    | BE113454              | 1.45 | 4 | 221007_s_at | NM_030917 | 1.43 | 8  | 1452720_a_at | BM199874  | 1.883 | 15 |
| FKBP2   | C | 1375669_at   | FK506 binding protein 2 (predicted)                                        | BI285619              | 2.1  | 6 | 203391_at   | NM_004470 | 2.17 | 14 | 1450694_at   | NM_008020 | 1.951 | 17 |
| FOSB    | C | 1375043_at   | FBJ murine osteosarcoma viral oncogene homolog                             | BF415939              | 14.6 | 6 | 202768_at   | NM_006732 | 5.04 | 10 | 1422134_at   | NM_008036 | 12.58 | 17 |
| FOSB    | C | 1375043_at   | FBJ murine osteosarcoma viral oncogene homolog                             | BF415939              | 14.6 | 6 | 202768_at   | NM_006732 | 5.04 | 10 | 1423100_at   | AV026617  | 7.402 | 17 |
| FOXA2   |   | 1368711_at   | forkhead box A2                                                            | NM_012743             | 10.6 | 4 | 210103_s_at | AB028021  | 4.43 | 14 | 1422833_at   | NM_010446 | 10.66 | 17 |
| FOXA2   |   | 1368711_at   | forkhead box A2                                                            | NM_012743             | 10.6 | 4 | 40284_at    | AB028021  | 2.88 | 14 | 1422833_at   | NM_010446 | 10.66 | 17 |
| G6PC2   | B |              | glucose-6-phosphatase, catalytic, 2                                        | not on RG230.20 array |      |   | 221453_at   | NM_021176 | 8.76 | 14 | 1423529_at   | Z47787    | 51.7  | 17 |
| GAD1    | A | 1368344_at   | glutamate decarboxylase 1                                                  | NM_017007             | 44.4 | 6 | 205278_at   | NM_000817 | 2.48 | 8  | 1416561_at   | AF326547  | 2.981 | 13 |
| GAD1    | A | 1370760_a_at | glutamate decarboxylase 1                                                  | M38350                | 7.6  | 6 | 205278_at   | NM_000817 | 2.48 | 8  | 1416561_at   | AF326547  | 2.981 | 13 |
| GADD45G |   | 1388792_at   | growth arrest and DNA-damage-inducible 45 gamma (predicted)                | AI599423              | 3.34 | 6 | 204121_at   | NM_006705 | 1.65 | 12 | 1453851_a_at | AK007410  | 8.5   | 17 |
| GARNL1  | C | 1368994_a_at | GTPase activating RANGAP domain-like 1                                     | AF041107              | 1.43 | 6 | 214855_s_at | AL050050  | 1.27 | 8  | 1458117_at   | BB468955  | 2.343 | 17 |
| GARNL4  | B |              | GTPase activating Rap/RanGAP domain-like 4                                 | not on RG230.20 array |      |   | 213280_at   | AK000478  | 5.06 | 14 | 1434754_at   | AU067654  | 6.699 | 17 |
| GARS    |   | 1388715_at   | glycyl-tRNA synthetase (predicted)                                         | AA818089              | 1.72 | 6 | 208693_s_at | D30658    | 1.58 | 12 | 1423784_at   | BC021747  | 1.525 | 17 |
| GARS    | C | 1388715_at   | glycyl-tRNA synthetase (predicted)                                         | AA818089              | 1.72 | 6 | 208693_s_at | D30658    | 1.58 | 12 | 1423784_at   | BC021747  | 1.525 | 17 |
| GCGR    |   | 1370522_at   | glucagon receptor                                                          | L04796                | 3.45 | 4 | 210565_at   | U03469    | 1.36 | 12 | 1450127_a_at | NM_008101 | 3.092 | 15 |
| GCK     |   | 1387312_a_at | glucokinase                                                                | NM_012565             | 1.86 | 4 | 211167_s_at | M69051    | 2.05 | 14 | 1419146_a_at | BC011139  | 14.77 | 17 |
| GCK     |   | 1387312_a_at | glucokinase                                                                | NM_012565             | 1.86 | 4 | 211167_s_at | M69051    | 2.05 | 14 | 1425303_at   | L38990    | 8.96  | 17 |
| GFPT1   | C | 1377314_at   | glutamine fructose-6-phosphate transaminase 1                              | BE104391              | 1.36 | 4 | 202722_s_at | NM_002056 | 3.65 | 14 | 1444329_at   | BB533749  | 2.147 | 17 |
| GFPT1   | C | 1373373_at   | Glutamine fructose-6-phosphate transaminase 1                              | BI295011              | 2.54 | 6 | 202721_s_at | BE645771  | 1.64 | 12 | 1444329_at   | BB533749  | 2.147 | 17 |
| GGA2    | C | 1372408_at   | golgi associated, gamma adaptin ear containing, ARF binding protein 2      | BI278620              | 1.81 | 6 | 210658_s_at | BC000284  | 1.7  | 10 | 1428141_at   | AK004632  | 2.12  | 13 |
| GGA2    | C | 1372408_at   | golgi associated, gamma adaptin ear containing, ARF binding protein 2      | BI278620              | 1.81 | 6 | 208913_at   | AA868560  | 1.52 | 10 | 1428141_at   | AK004632  | 2.12  | 13 |
| GGA2    | C | 1372408_at   | golgi associated, gamma adaptin ear containing, ARF binding protein 2      | BI278620              | 1.81 | 6 | 208915_s_at | AF190863  | 1.16 | 10 | 1428141_at   | AK004632  | 2.12  | 13 |
| GGA2    | C | 1372408_at   | golgi associated, gamma adaptin ear containing, ARF binding protein 2      | BI278620              | 1.81 | 6 | 214190_x_at | AI799984  | 1.14 | 12 | 1428141_at   | AK004632  | 2.12  | 13 |
| GLA     |   | 1373199_at   | Galactosidase, alpha (mapped)                                              | AA943573              | 1.57 | 4 | 214430_at   | NM_000169 | 1.14 | 10 | 1449006_at   | NM_013463 | 2.331 | 17 |
| GLG1    | C | 1387367_at   | golgi apparatus protein 1                                                  | NM_017211             | 2.31 | 6 | 214730_s_at | AK025457  | 1.51 | 12 | 1448580_at   | BG074127  | 2.054 | 17 |
| GLG1    | C | 1387367_at   | golgi apparatus protein 1                                                  | NM_017211             | 2.31 | 6 | 212045_at   | N32761    | 1.15 | 12 | 1448580_at   | BG074127  | 2.054 | 17 |
| GLP1R   | A | 1369699_at   | glucagon-like peptide 1 receptor                                           | NM_012728             | 8.09 | 6 | 208391_s_at | NM_002062 | 1.6  | 14 | 1422330_at   | NM_021332 | 7.109 | 17 |

|           |   |            |                                                                       |                       |      |   |             |           |      |    |              |           |       |    |
|-----------|---|------------|-----------------------------------------------------------------------|-----------------------|------|---|-------------|-----------|------|----|--------------|-----------|-------|----|
| GLP1R     | A | 1369699_at | glucagon-like peptide 1 receptor                                      | NM_012728             | 8.09 | 6 | 208401_s_at | U01157    | 1.35 | 12 | 1422330_at   | NM_021332 | 7.109 | 17 |
| GLP1R     | A | 1369699_at | glucagon-like peptide 1 receptor                                      | NM_012728             | 8.09 | 6 | 208390_s_at | U01104    | 1.16 | 12 | 1422330_at   | NM_021332 | 7.109 | 17 |
| GLP1R     | A | 1369699_at | glucagon-like peptide 1 receptor                                      | NM_012728             | 8.09 | 6 | 211232_x_at | L23503    | 1.19 | 12 | 1458719_at   | BM233846  | 1.828 | 17 |
| GLRX2     |   | 1374340_at | Glutaredoxin 2 (thioltransferase)                                     | AA848536              | 1.38 | 4 | 219933_at   | NM_016066 | 1.26 | 8  | 1422998_a_at | NM_023505 | 1.754 | 15 |
| GLRX2     |   | 1373675_at | glutaredoxin 2 (thioltransferase) (predicted)                         | AW525635              | 1.36 | 4 | 219933_at   | NM_016066 | 1.26 | 8  | 1422998_a_at | NM_023505 | 1.754 | 15 |
| GMPPA     |   | 1372859_at | GDP-mannose pyrophosphorylase A                                       | AI598958              | 1.58 | 6 | 218070_s_at | NM_013335 | 1.34 | 8  | 1417578_a_at | NM_133708 | 1.878 | 17 |
| GOLGA4    | C | 1394347_at | golgi autoantigen golgin subtype a4; tGolgin-1                        | BF568007              | 2.98 | 4 | 201567_s_at | NM_002078 | 1.89 | 10 | 1448803_at   | NM_018748 | 6.103 | 17 |
| GOLGA4    | C | 1394347_at | golgi autoantigen golgin subtype a4; tGolgin-1                        | BF568007              | 2.98 | 4 | 201567_s_at | NM_002078 | 1.89 | 10 | 1460213_at   | NM_018748 | 2.014 | 15 |
| GOLGA5    | C | 1376650_at | golgi autoantigen, golgin subfamily a, 5 (predicted)                  | BF399323              | 1.66 | 6 | 218241_at   | NM_005113 | 1.84 | 12 | 1418447_at   | NM_013747 | 1.771 | 17 |
| GORASP2   | C | 1370325_at | golgi reassembly stacking protein 2                                   | AF110267              | 1.49 | 6 | 208843_s_at | BC001408  | 1.57 | 12 | 1424710_a_at | BC016455  | 1.879 | 17 |
| GORASP2   | C | 1370325_at | golgi reassembly stacking protein 2                                   | AF110267              | 1.49 | 6 | 207812_s_at | NM_015530 | 1.36 | 12 | 1424710_a_at | BC016455  | 1.879 | 17 |
| GORASP2   | C | 1370325_at | golgi reassembly stacking protein 2                                   | AF110267              | 1.49 | 6 | 208842_s_at | W93787    | 1.34 | 14 | 1424710_a_at | BC016455  | 1.879 | 17 |
| GOSR2     |   | 1374900_at | golgi SNAP receptor complex member 2                                  | BM388807              | 1.8  | 6 | 213144_at   | AI074611  | 1.19 | 12 | 1419371_s_at | NM_019650 | 1.636 | 17 |
| GOSR2     |   | 1375438_at | golgi SNAP receptor complex member 2                                  | AA964687              | 1.65 | 6 | 213180_s_at | BE895285  | 1.19 | 8  | 1419371_s_at | NM_019650 | 1.636 | 17 |
| GPD2      |   | 1387670_at | glycerol-3-phosphate dehydrogenase 2                                  | U08027                | 1.4  | 2 | 210007_s_at | U36310    | 1.75 | 12 | 1452741_s_at | BQ175968  | 4.985 | 17 |
| GPD2      |   | 1369666_at | Glycerol-3-phosphate dehydrogenase 2                                  | U08027                | 1.34 | 0 | 210007_s_at | U36310    | 1.75 | 12 | 1452741_s_at | BQ175968  | 4.985 | 17 |
| GSPT1     |   | 1371585_at | G1 to S phase transition 1                                            | BE108192              | 1.41 | 6 | 201912_s_at | NM_002094 | 1.65 | 10 | 1455173_at   | AW537663  | 1.648 | 13 |
| GSPT1     |   | 1371585_at | G1 to S phase transition 1                                            | BE108192              | 1.41 | 6 | 215438_x_at | BE906054  | 1.43 | 8  | 1455173_at   | AW537663  | 1.648 | 13 |
| GSPT1     |   | 1371585_at | G1 to S phase transition 1                                            | BE108192              | 1.41 | 6 | 217595_at   | AV701723  | 1.24 | 10 | 1455173_at   | AW537663  | 1.648 | 13 |
| HADH      | B | 1370237_at | L-3-hydroxyacyl-Coenzyme A dehydrogenase, short chain                 | AA799574              | 5.96 | 6 | 201036_s_at | NM_005327 | 4.88 | 14 | 1436756_x_at | BB114220  | 2.089 | 13 |
| HADH      | B | 1370237_at | L-3-hydroxyacyl-Coenzyme A dehydrogenase, short chain                 | AA799574              | 5.96 | 6 | 211569_s_at | AF001903  | 4.71 | 14 | 1455972_x_at | AV018774  | 2.261 | 13 |
| HDFFRP3   | B | 1370458_at | hepatoma-derived growth factor, related protein 3                     | AF389347              | 1.41 | 2 | 209524_at   | AK001280  | 3.21 | 8  | 1435977_at   | BM240385  | 2.504 | 13 |
| HDFFRP3   | B | 1374151_at | Hepatoma-derived growth factor, related protein 3                     | BI289940              | 1.59 | 0 | 209524_at   | AK001280  | 3.21 | 8  | 1450924_at   | BB291880  | 1.796 | 13 |
| HDLBP     | C | 1398859_at | high density lipoprotein binding protein                              | U90725                | 1.52 | 4 | 221767_x_at | AA515560  | 1.47 | 10 | 1449615_s_at | C77256    | 9.396 | 17 |
| HDLBP     | C | 1388918_at | High density lipoprotein binding protein                              | BG378074              | 1.73 | 6 | 200643_at   | NM_005336 | 1.25 | 8  | 1415988_at   | BG065877  | 9.246 | 17 |
| HDLBP     | C | 1388918_at | High density lipoprotein binding protein                              | BG378074              | 1.73 | 6 | 200643_at   | NM_005336 | 1.25 | 8  | 1419806_at   | C77256    | 7.508 | 17 |
| HERPUD1   | C | 1367741_at | homocysteine-inducible, endoplasmic reticulum stress-inducible, ubiqu | NM_053523             | 4.43 | 6 | 217168_s_at | AF217990  | 1.72 | 14 | 1435626_a_at | AI835088  | 2.46  | 15 |
| HERPUD1   | C | 1367741_at | homocysteine-inducible, endoplasmic reticulum stress-inducible, ubiqu | NM_053523             | 4.43 | 6 | 217168_s_at | AF217990  | 1.72 | 14 | 1435626_a_at | AI835088  | 2.46  | 15 |
| HIC2      |   | 1376400_at | hypermethylated in cancer 2 (predicted)                               | BG380445              | 1.08 | 4 | 212965_at   | BE465318  | 1.21 | 12 | 1454944_at   | BE648070  | 2.167 | 15 |
| HLXB9     |   |            | homeo box HB9                                                         | not on RG230.20 array |      |   | 214614_at   | AI738662  | 3.6  | 14 | 1460299_at   | NM_019944 | 11.54 | 17 |
| HMG3      | C | 1371989_at | high mobility group nucleosomal binding domain 3                      | BM386357              | 2.76 | 4 | 209377_s_at | AF274949  | 1.25 | 12 | 1434875_a_at | AV018952  | 3.707 | 15 |
| HMG3      | C | 1371989_at | high mobility group nucleosomal binding domain 3                      | BM386357              | 2.76 | 4 | 209377_s_at | AF274949  | 1.25 | 12 | 1431777_a_at | AK002970  | 2.612 | 15 |
| HNRPC     |   | 1371505_at | heterogeneous nuclear ribonucleoprotein C (predicted)                 | BG381750              | 1.44 | 4 | 200751_s_at | BE898861  | 1.41 | 10 | 1418693_at   | NM_016884 | 4.408 | 17 |
| HNRPC     | C | 1371505_at | heterogeneous nuclear ribonucleoprotein C (predicted)                 | BG381750              | 1.44 | 4 | 200014_s_at | NM_004500 | 1.24 | 10 | 1418693_at   | NM_016884 | 4.408 | 17 |
| HNRPD     | C | 1372810_at | heterogeneous nuclear ribonucleoprotein D-like (predicted)            | BF281256              | 1.5  | 4 | 209067_s_at | D89092    | 1.4  | 8  | 1428224_at   | AV101245  | 1.976 | 17 |
| HSP90B1   | C | 1388331_at | heat shock protein 90kDa beta (Grp94), member 1 (tumor rejection anti | BG057543              | 2.67 | 6 | 200598_s_at | AI582238  | 2.78 | 14 | 1438040_a_at | BE995678  | 3.137 | 15 |
| HSP90B1   | C | 1388331_at | heat shock protein 90kDa beta (Grp94), member 1 (tumor rejection anti | BG057543              | 2.67 | 6 | 216449_x_at | AK025862  | 2.72 | 14 | 1438040_a_at | BE995678  | 3.137 | 15 |
| HSP90B1   | C | 1388331_at | heat shock protein 90kDa beta (Grp94), member 1 (tumor rejection anti | BG057543              | 2.67 | 6 | 200599_s_at | NM_003299 | 1.75 | 14 | 1438040_a_at | BE995678  | 3.137 | 15 |
| HSPA4L    |   | 1371783_at | heat shock 70kDa protein 4-like                                       | AI009936              | 1.59 | 6 | 205543_at   | NM_014278 | 1.73 | 12 | 1425993_a_at | D67017    | 2.093 | 13 |
| HSPA5 / G | C | 1370283_at | heat shock 70kD protein 5                                             | M14050                | 2.92 | 6 | 211936_at   | AF216292  | 1.95 | 14 | 1427464_s_at | AJ002387  | 2.179 | 11 |
| HSPA5 / G | C | 1370283_at | heat shock 70kD protein 5                                             | M14050                | 2.92 | 6 | 211936_at   | AF216292  | 1.95 | 14 | 1416064_a_at | NM_022310 | 1.762 | 15 |
| HYOU1     | A | 1371442_at | hypoxia up-regulated 1                                                | BI282904              | 4.53 | 6 | 200825_s_at | NM_006389 | 1.83 | 14 | 1451913_a_at | BC019785  | 6.251 | 17 |
| HYOU1     | A | 1370665_at | hypoxia up-regulated 1                                                | U41853                | 3.87 | 6 | 200825_s_at | NM_006389 | 1.83 | 14 | 1451913_a_at | BC019785  | 6.251 | 17 |
| IAPP      | B | 1387660_at | islet amyloid polypeptide                                             | M25390                | 106  | 6 | 207062_at   | NM_000415 | 59.8 | 14 | 1437323_a_at | BB434117  | 167.2 | 17 |
| IAPP      | B | 1387660_at | islet amyloid polypeptide                                             | M25390                | 106  | 6 | 207062_at   | NM_000415 | 59.8 | 14 | 1423510_at   | BM569571  | 129.3 | 17 |
| IAPP      | B | 1387660_at | islet amyloid polypeptide                                             | M25390                | 106  | 6 | 207062_at   | NM_000415 | 59.8 | 14 | 1423509_a_at | BM569571  | 102.7 | 17 |
| IAPP      | B | 1387660_at | islet amyloid polypeptide                                             | M25390                | 106  | 6 | 207062_at   | NM_000415 | 59.8 | 14 | 1456004_x_at | BB434117  | 52.23 | 17 |
| ICA1      |   | 1367787_at | islet cell autoantigen 1                                              | NM_030844             | 9.43 | 6 | 210547_x_at | L21181    | 1.49 | 14 | 1417901_a_at | NM_010492 | 4.004 | 17 |
| ICA1      |   | 1367787_at | islet cell autoantigen 1                                              | NM_030844             | 9.43 | 6 | 207949_s_at | NM_004968 | 1.4  | 12 | 1417901_a_at | NM_010492 | 4.004 | 17 |
| ICA1      |   | 1367787_at | islet cell autoantigen 1                                              | NM_030844             | 9.43 | 6 | 214191_at   | W67992    | 1.14 | 12 | 1431644_a_at | AK005965  | 2.774 | 13 |

|             |   |              |                                                                         |                       |      |    |             |           |      |    |              |           |       |    |
|-------------|---|--------------|-------------------------------------------------------------------------|-----------------------|------|----|-------------|-----------|------|----|--------------|-----------|-------|----|
| IDS         | B | 1375843_at   | Iduronate 2-sulfatase                                                   | BM383777              | 2.13 | 2  | 202439_s_at | NM_000202 | 5.13 | 14 | 1434751_at   | BB493523  | 11.21 | 17 |
| IDS         | B | 1375843_at   | Iduronate 2-sulfatase                                                   | BM383777              | 2.13 | 2  | 212221_x_at | AV703259  | 4.47 | 10 | 1434751_at   | BB493523  | 11.21 | 17 |
| IDS         | B | 1375843_at   | Iduronate 2-sulfatase                                                   | BM383777              | 2.13 | 2  | 202438_x_at | BF346014  | 4.36 | 12 | 1434751_at   | BB493523  | 11.21 | 17 |
| IDS         | B | 1375843_at   | Iduronate 2-sulfatase                                                   | BM383777              | 2.13 | 2  | 212223_at   | AI926544  | 4.31 | 12 | 1434751_at   | BB493523  | 11.21 | 17 |
| IDS         | B | 1375843_at   | Iduronate 2-sulfatase                                                   | BM383777              | 2.13 | 2  | 206342_x_at | NM_006123 | 3.1  | 14 | 1434751_at   | BB493523  | 11.21 | 17 |
| IDS         | B | 1375843_at   | Iduronate 2-sulfatase                                                   | BM383777              | 2.13 | 2  | 217432_s_at | AF179281  | 1.74 | 14 | 1434751_at   | BB493523  | 11.21 | 17 |
| IDS         | B | 1375843_at   | Iduronate 2-sulfatase                                                   | BM383777              | 2.13 | 2  | 210666_at   | AF050145  | 1.22 | 12 | 1434751_at   | BB493523  | 11.21 | 17 |
| IDS         | B | 1375843_at   | Iduronate 2-sulfatase                                                   | BM383777              | 2.13 | 2  | 211782_at   | BC006170  | 1.63 | 14 | 1455481_at   | BM241722  | 2.978 | 15 |
| IGF1R       |   | 1368123_at   | insulin-like growth factor 1 receptor                                   | NM_052807             | 1.97 | 6  | 203628_at   | H05812    | 2.13 | 10 | 1452108_at   | BE980124  | 6.634 | 17 |
| IGF1R       |   | 1390671_at   | Insulin-like growth factor 1 receptor                                   | AI044666              | 1.35 | 2  | 203628_at   | H05812    | 2.13 | 10 | 1452108_at   | BE980124  | 6.634 | 17 |
| IGF2        |   | 1367571_a_at | insulin-like growth factor 2                                            | NM_031511             | 2.28 | 4  | 202410_x_at | NM_000612 | 1.66 | 10 | 1448152_at   | NM_010514 | 4.061 | 15 |
| IGF2        |   | 1367571_a_at | insulin-like growth factor 2                                            | NM_031511             | 2.28 | 4  | 210881_s_at | M17863    | 1.62 | 10 | 1424112_at   | BG092290  | 2.121 | 17 |
| IKBKAP      | C | 1390504_at   | Inhibitor of kappa light polypeptide enhancer in B-cells, kinase comple | AW524470              | 1.35 | 6  | 202491_s_at | NM_003640 | 1.31 | 8  | 1424142_at   | AF367244  | 1.961 | 17 |
| IL13RA1     |   | 1388711_at   | interleukin 13 receptor, alpha 1                                        | BF282650              | 1.82 | 4  | 211612_s_at | U62858    | 2.12 | 14 | 1427164_at   | BB730912  | 3.887 | 17 |
| IL13RA1     |   | 1370728_at   | interleukin 13 receptor, alpha 1                                        | AY044251              | 1.62 | 4  | 201888_s_at | U81379    | 2.18 | 12 | 1427164_at   | BB730912  | 3.887 | 17 |
| IL13RA1     |   | 1370728_at   | interleukin 13 receptor, alpha 1                                        | AY044251              | 1.62 | 4  | 210904_s_at | U81380    | 1.3  | 10 | 1427164_at   | BB730912  | 3.887 | 17 |
| INS         | B | 1370077_at   | insulin 2                                                               | NM_019130             | 56.7 | 6  | 206598_at   | NM_000207 | 105  | 14 | 1422446_x_at | NM_008387 | 46.45 | 17 |
| INS1 / INS2 | B | 1387815_at   | insulin 1 /// insulin 2                                                 | NM_019129             | 35.2 | 6  | 206598_at   | NM_000207 | 105  | 14 | 1422447_at   | NM_008386 | 66.14 | 17 |
| INSM1       | B |              | insulinoma-associated 1                                                 | not on RG230.20 array |      |    | 206502_s_at | NM_002196 | 25.3 | 14 | 1455865_at   | BB468410  | 54.21 | 17 |
| INSM1       | B |              | insulinoma-associated 1                                                 | not on RG230          | 0    | 0  | 206502_s_at | NM_002196 | 25.3 | 14 | 1421399_at   | NM_016889 | 14.43 | 17 |
| IQGAP1      | C | 1388764_at   | IQ motif containing GTPase activating protein 1 (predicted)             | BM387072              | 1.57 | 2  | 200791_s_at | NM_003870 | 2.26 | 10 | 1431395_a_at | BI645591  | 3.016 | 15 |
| IQGAP1      | C | 1388764_at   | IQ motif containing GTPase activating protein 1 (predicted)             | BM387072              | 1.57 | 2  | 210840_s_at | D29640    | 2.16 | 10 | 1431396_at   | BI645591  | 3.019 | 15 |
| IRAK1       | C | 1373379_at   | interleukin-1 receptor-associated kinase 1 (predicted)                  | BF396350              | 2.01 | 6  | 201587_s_at | NM_001569 | 1.7  | 10 | 1460649_at   | BE949425  | 1.83  | 13 |
| IRF6        |   | 1377379_at   | interferon regulatory factor 6 (predicted)                              | BF410603              | 4.36 | 6  | 202597_at   | AU144284  | 1.65 | 12 | 1418301_at   | NM_016851 | 1.665 | 11 |
| IRF6        |   | 1386568_at   | interferon regulatory factor 6 (predicted)                              | BF557891              | 3.51 | 4  | 202597_at   | AU144284  | 1.65 | 12 | 1418301_at   | NM_016851 | 1.665 | 11 |
| ITM2C       |   | 1371334_at   | integral membrane protein 2C (predicted)                                | BG668228              | 1.88 | -2 | 221004_s_at | NM_030926 | 2.13 | 10 | 1415961_at   | NM_022417 | 2.191 | 15 |
| JUN         | C | 1374404_at   | c-Jun / v-jun sarcoma virus 17 oncogene homolog (avian)                 | BI288619              | 7.79 | 4  | 201465_s_at | BC002646  | 3.97 | 12 | 1448694_at   | NM_010591 | 2.41  | 15 |
| JUN         | C | 1389528_s_at | c-Jun / v-jun sarcoma virus 17 oncogene homolog (avian)                 | BI288619              | 5.27 | 6  | 201466_s_at | NM_002228 | 3.6  | 10 | 1417409_at   | NM_010591 | 3.658 | 15 |
| JUN         | C | 1369788_s_at | c-Jun / v-jun sarcoma virus 17 oncogene homolog (avian)                 | NM_021835             | 3.1  | 4  | 201464_x_at | BG491844  | 2.87 | 14 | 1448694_at   | NM_010591 | 2.41  | 15 |
| KCNH2       |   | 1368343_at   | potassium voltage-gated channel, subfamily H (eag-related), member :    | NM_053949             | 1.61 | 4  | 205262_at   | NM_000238 | 4.11 | 14 | 1449544_a_at | NM_013569 | 2.737 | 15 |
| KCNH2       |   | 1368343_at   | potassium voltage-gated channel, subfamily H (eag-related), member :    | NM_053949             | 1.61 | 4  | 210036_s_at | AB044806  | 2.44 | 14 | 1449544_a_at | NM_013569 | 2.737 | 15 |
| KIF5B       |   | 1372444_at   | kinesin family member 5B                                                | AW918352              | 2.62 | 6  | 201992_s_at | NM_004521 | 1.46 | 10 | 1418431_at   | BI328541  | 4.809 | 17 |
| KIF5B       |   | 1372444_at   | kinesin family member 5B                                                | AW918352              | 2.62 | 6  | 201991_s_at | BF223224  | 1.28 | 8  | 1418429_at   | BI328541  | 2.029 | 13 |
| KIF5C       | A | 1373977_at   | Kinesin family member 5C (predicted)                                    | BE108253              | 5.73 | 2  | 203130_s_at | NM_004522 | 7.19 | 8  | 1457255_x_at | BB099427  | 8.989 | 17 |
| KIF5C       | A | 1373977_at   | Kinesin family member 5C (predicted)                                    | BE108253              | 5.73 | 2  | 203129_s_at | BF059313  | 6.16 | 8  | 1422945_a_at | AI844677  | 4.754 | 17 |
| KIF5C       | A | 1373977_at   | Kinesin family member 5C (predicted)                                    | BE108253              | 5.73 | 2  | 203129_s_at | BF059313  | 6.16 | 8  | 1450804_at   | AI844677  | 1.783 | 17 |
| LEPR        |   | 1369739_at   | leptin receptor                                                         | D85558                | 1.41 | 6  | 209894_at   | U50748    | 2.22 | 10 | 1425873_a_at | U58861    | 2.541 | 17 |
| LEPR        |   | 1369739_at   | leptin receptor                                                         | D85558                | 1.41 | 6  | 211354_s_at | U52913    | 1.42 | 8  | 1425873_a_at | U58861    | 2.541 | 17 |
| LEPR        |   | 1369739_at   | leptin receptor                                                         | D85558                | 1.41 | 6  | 211356_x_at | U66495    | 1.33 | 8  | 1425873_a_at | U58861    | 2.541 | 17 |
| LEPR        |   | 1369739_at   | leptin receptor                                                         | D85558                | 1.41 | 6  | 211355_x_at | U52914    | 1.31 | 8  | 1425873_a_at | U58861    | 2.541 | 17 |
| LMAN1       | A | 1368848_at   | lectin, mannose-binding, 1                                              | NM_053886             | 3.9  | 6  | 203293_s_at | NM_005570 | 1.84 | 14 | 1428130_at   | BG071597  | 5.81  | 17 |
| LMAN1       | A | 1368848_at   | lectin, mannose-binding, 1                                              | NM_053886             | 3.9  | 6  | 203293_s_at | NM_005570 | 1.84 | 14 | 1428129_at   | BG071597  | 4.626 | 17 |
| LMAN1       | A | 1368848_at   | lectin, mannose-binding, 1                                              | NM_053886             | 3.9  | 6  | 203293_s_at | NM_005570 | 1.84 | 14 | 1452671_s_at | BG071597  | 3.926 | 17 |
| LMAN2       |   | 1373815_at   | lectin, mannose-binding 2 (predicted)                                   | BI304064              | 1.49 | 4  | 200805_at   | NM_006816 | 1.68 | 10 | 1423074_at   | AK004952  | 1.527 | 13 |
| LNPEP       |   | 1370743_a_at | leucyl/cystinyl aminopeptidase                                          | AY079189              | 1.7  | 6  | 207904_s_at | NM_005575 | 1.1  | 12 | 1438432_at   | BE850004  | 1.948 | 17 |
| LONP1       |   | 1375802_at   | Ion peptidase 1, mitochondrial (Protease, serine, 15)                   | AI011610              | 1.69 | 6  | 209017_s_at | U02389    | 1.38 | 14 | 1428365_a_at | AK004820  | 2.054 | 17 |
| LRBA        |   | 1374495_at   | LPS-responsive beige-like anchor (predicted)                            | BM388121              | 2.57 | 6  | 212692_s_at | W60686    | 1.15 | 10 | 1436690_at   | BB494139  | 3.505 | 17 |
| LRBA        |   | 1374495_at   | LPS-responsive beige-like anchor (predicted)                            | BM388121              | 2.57 | 6  | 212692_s_at | W60686    | 1.15 | 10 | 1425717_at   | AF188506  | 2.313 | 17 |
| LRBA        |   | 1374495_at   | LPS-responsive beige-like anchor (predicted)                            | BM388121              | 2.57 | 6  | 214109_at   | AI659561  | 1.18 | 10 | 1449099_at   | NM_030695 | 1.941 | 13 |
| LRP12       |   | 1374108_at   | low density lipoprotein-related protein 12 (predicted)                  | BM388942              | 1.43 | 4  | 220254_at   | NM_013437 | 9.99 | 10 | 1433864_at   | AV254798  | 2.807 | 17 |

|          |                |                                                                           |                       |      |   |             |           |      |    |              |           |       |    |
|----------|----------------|---------------------------------------------------------------------------|-----------------------|------|---|-------------|-----------|------|----|--------------|-----------|-------|----|
| LRP12    | 1374108_at     | low density lipoprotein-related protein 12 (predicted)                    | BM388942              | 1.43 | 4 | 220253_s_at | NM_013437 | 2.71 | 12 | 1433864_at   | AV254798  | 2.807 | 17 |
| LRP12    | 1374108_at     | low density lipoprotein-related protein 12 (predicted)                    | BM388942              | 1.43 | 4 | 219631_at   | NM_024937 | 2.19 | 12 | 1433864_at   | AV254798  | 2.807 | 17 |
| LRRC8D   | 1373431_at     | leucine rich repeat containing 8 family, member D (alias: leucine rich re | AI101427              | 1.77 | 4 | 218684_at   | NM_018103 | 1.31 | 12 | 1447491_at   | BE987722  | 2.488 | 17 |
| LRRRC8D  | 1373431_at     | leucine rich repeat containing 8 family, member D (alias: leucine rich re | AI101427              | 1.77 | 4 | 218684_at   | NM_018103 | 1.31 | 12 | 1447491_at   | BB315861  | 1.996 | 15 |
| MAGED1   | 1367744_at     | melanoma antigen, family D, 2                                             | NM_080479             | 2.83 | 2 | 208682_s_at | AF126181  | 2.23 | 14 | 1426306_a_at | AF319976  | 1.534 | 13 |
| MAGED1   | 1367744_at     | melanoma antigen, family D, 2                                             | NM_080479             | 2.83 | 2 | 213627_at   | AI924630  | 1.41 | 10 | 1426306_a_at | AF319976  | 1.534 | 13 |
| MAGED2   | 1386895_at     | melanoma antigen, family D, 1                                             | NM_053409             | 4.44 | 6 | 209014_at   | AF217963  | 1.71 | 8  | 1450062_a_at | NM_019791 | 3.699 | 17 |
| MAP1B    | A 1371003_at   | microtubule-associated protein 1b                                         | BG378086              | 1.51 | 2 | 212233_at   | AL523076  | 4.6  | 8  | 1450397_at   | BB731480  | 11.28 | 17 |
| MAP1B    | A 1371003_at   | microtubule-associated protein 1b                                         | BG378086              | 1.51 | 2 | 212233_at   | AL523076  | 4.6  | 8  | 1421851_at   | BB731480  | 6.253 | 17 |
| MAP1B    | A 1371003_at   | microtubule-associated protein 1b                                         | BG378086              | 1.51 | 2 | 212233_at   | AL523076  | 4.6  | 8  | 1421850_at   | BB731480  | 2.08  | 13 |
| MAP1B    | A 1373363_at   | microtubule-associated protein 1b                                         | BI281702              | 2.39 | 0 | 214577_at   | BG164365  | 1.93 | 8  | 1444595_at   | BF148767  | 2.656 | 17 |
| MAP2     | 1388152_at     | microtubule-associated protein 2                                          | BG374290              | 20.5 | 2 | 210015_s_at | U89330    | 2.84 | 10 | 1443239_at   | BB386302  | 2.065 | 13 |
| MAP2     | 1368411_a_at   | microtubule-associated protein 2                                          | X74211                | 1.84 | 4 | 210015_s_at | U89330    | 2.84 | 10 | 1443239_at   | BB386302  | 2.065 | 13 |
| MBNL2    | A 1375140_at   | muscleblind-like 2 (predicted)                                            | AA818999              | 1.52 | 2 | 203640_at   | BE328496  | 1.61 | 10 | 1436858_at   | BB003847  | 1.557 | 7  |
| MED6     | C 1372269_at   | mediator of RNA polymerase II transcription, subunit 6 homolog (yeast     | AI229534              | 2.36 | 6 | 210104_at   | AF074723  | 1.24 | 12 | 1458343_x_at | AV070715  | 1.543 | 17 |
| MEFAP3   | 1390063_at     | microfibrillar-associated protein 3                                       | BG380473              | 2.5  | 6 | 214588_s_at | R38475    | 1.22 | 10 | 1434562_at   | AW536327  | 6.121 | 17 |
| MINPP1   | 1388126_at     | multiple inositol polyphosphate histidine phosphatase 1                   | BG380493              | 2.17 | 4 | 209585_s_at | AF084943  | 2.83 | 14 | 1455787_x_at | AV339366  | 3.048 | 17 |
| MLX      | 1371929_at     | MAX-like protein X (transcription factor-like 4) (predicted)              | BI278563              | 1.74 | 6 | 217909_s_at | BF056105  | 1.23 | 10 | 1418437_a_at | NM_011550 | 3.64  | 17 |
| MYO1D    | B 1388917_at   | myosin ID                                                                 | BI279786              | 3.86 | 6 | 212338_at   | AA621962  | 7.66 | 14 | 1458550_at   | BB200258  | 2.347 | 17 |
| MYO1D    | B 1369779_at   | myosin ID                                                                 | NM_012983             | 1.71 | 6 | 212338_at   | AA621962  | 7.66 | 14 | 1458550_at   | BB200258  | 2.347 | 17 |
| MYO5A    | 1368450_at     | myosin Va                                                                 | NM_022178             | 1.75 | 4 | 204527_at   | NM_000259 | 1.31 | 10 | 1419754_at   | NM_010864 | 1.5   | 13 |
| NAP1L1   | C 1371872_at   | Nucleosome assembly protein 1-like 1                                      | BE108905              | 1.36 | 0 | 204528_s_at | NM_004537 | 1.87 | 10 | 1420477_at   | BG064031  | 1.73  | 13 |
| NAP1L1   | C 1371872_at   | Nucleosome assembly protein 1-like 1                                      | BE108905              | 1.36 | 0 | 213864_s_at | AI985751  | 1.81 | 10 | 1420477_at   | BG064031  | 1.73  | 13 |
| NAP1L1   | C 1371872_at   | Nucleosome assembly protein 1-like 1                                      | BE108905              | 1.36 | 0 | 212967_x_at | AW148801  | 1.6  | 10 | 1420477_at   | BG064031  | 1.73  | 13 |
| NAP1L1   | C 1371872_at   | Nucleosome assembly protein 1-like 1                                      | BE108905              | 1.36 | 0 | 208752_x_at | AI888672  | 1.55 | 12 | 1420477_at   | BG064031  | 1.73  | 13 |
| NCALD    | A 1372953_at   | neurocalcin delta                                                         | AI101330              | 3.49 | 2 | 211685_s_at | AF251061  | 1.9  | 8  | 1417568_at   | BG071381  | 1.688 | 11 |
| NCBP2    | 1383965_at     | nuclear cap binding protein subunit 2 (predicted)                         | BI282103              | 2.73 | 2 | 201517_at   | BC001255  | 1.23 | 10 | 1423046_s_at | BE285362  | 1.859 | 17 |
| NCBP2    | 1383965_at     | nuclear cap binding protein subunit 2 (predicted)                         | BI282103              | 2.73 | 2 | 201521_s_at | NM_007362 | 1.13 | 10 | 1423046_s_at | BE285362  | 1.859 | 17 |
| NEFM     | A 1367845_at   | neurofilament 3, medium                                                   | NM_017029             | 3.27 | 2 | 205113_at   | NM_005382 | 10.8 | 10 | 1457015_at   | BB258427  | 3.819 | 15 |
| NEK1     | 1389996_at     | NIMA (never in mitosis gene a)-related expressed kinase 1 (predicted)     | AI406369              | 1.48 | 4 | 213331_s_at | AV700007  | 2.02 | 12 | 1453612_at   | AV254337  | 5.595 | 17 |
| NEK1     | 1389996_at     | NIMA (never in mitosis gene a)-related expressed kinase 1 (predicted)     | AI406369              | 1.48 | 4 | 213331_s_at | AV700007  | 2.02 | 12 | 1434267_at   | BG069735  | 1.783 | 13 |
| NEO1     | 1376786_a_at   | Neogenin                                                                  | BF397709              | 2.79 | 6 | 204321_at   | NM_002499 | 1.59 | 12 | 1447693_s_at | BB350308  | 2.818 | 17 |
| NEUROD1  | A 1394135_at   | Neurogenic differentiation 1                                              | AI639109              | 14.7 | 6 | 206282_at   | NM_002500 | 21   | 12 | 1426413_at   | BM116592  | 4.207 | 13 |
| NEUROD1  | A 1387288_at   | neurogenic differentiation 1                                              | NM_019218             | 7.09 | 6 | 206282_at   | NM_002500 | 21   | 12 | 1426412_at   | BM116592  | 3.089 | 13 |
| NFIC     | 1371176_at     | nuclear factor I/C                                                        | AB012233              | 1.35 | 4 | 206929_s_at | NM_005597 | 1.19 | 10 | 1450661_x_at | NM_008688 | 2.342 | 17 |
| NKX2-2   | B 1385387_at   | NK2 transcription factor related, locus 2 (Drosophila) (predicted)        | not on RG230A array   |      |   | 206915_at   | NM_002509 | 43.8 | 14 | 1421112_at   | NM_010919 | 40.65 | 17 |
| NKX6-1   | B 1368998_at   | NK6 transcription factor related, locus 1 (Drosophila)                    | NM_031737             | 18.8 | 6 | 221366_at   | NM_006168 | 2.51 | 14 | 1425828_at   | AF357883  | 79.27 | 17 |
| NPTX2    | B              | neuronal pentraxin II                                                     | not on RG230.20 array |      |   | 213479_at   | U26662    | 32.3 | 14 | 1420720_at   | NM_016789 | 2.606 | 13 |
| NPY      | 1387154_at     | neuropeptide Y                                                            | NM_012614             | 2.12 | 6 | 206001_at   | NM_000905 | 1.93 | 10 | 1419127_at   | NM_023456 | 1.489 | 9  |
| NUCB2    | C 1370000_at   | nucleobindin 2                                                            | NM_021663             | 6.77 | 6 | 203675_at   | NM_005013 | 6.34 | 14 | 1418355_at   | NM_016773 | 6.486 | 17 |
| NUP98    | C 1368747_at   | nucleoporin 98                                                            | NM_031074             | 1.43 | 4 | 210793_s_at | U41815    | 1.67 | 10 | 1439154_at   | BB473634  | 1.954 | 17 |
| P2RY1    | 1370606_at     | purinergic receptor P2Y, G-protein coupled 1                              | U22830                | 19.9 | 6 | 207455_at   | NM_002563 | 1.17 | 10 | 1421456_at   | NM_008772 | 7.131 | 17 |
| PAFAH1B1 | A 1369641_at   | platelet-activating factor acetylhydrolase, isoform 1b, alpha2 subunit    | BM392366              | 1.58 | 6 | 200816_s_at | NM_000430 | 1.68 | 8  | 1422793_at   | BB539054  | 2.035 | 13 |
| PAFAH1B1 | A 1369642_at   | platelet-activating factor acetylhydrolase, isoform 1b, alpha2 subunit    | BM392366              | 1.45 | 0 | 200816_s_at | NM_000430 | 1.68 | 8  | 1422793_at   | BB539054  | 2.035 | 13 |
| PAM      | B 1370502_at   | peptidylglycine alpha-amidating monooxygenase                             | AW534339              | 3.73 | 6 | 214620_x_at | BF038548  | 6.34 | 14 | 1418908_at   | NM_013626 | 2.265 | 15 |
| PAM      | B 1367687_a_at | peptidylglycine alpha-amidating monooxygenase                             | AW534339              | 3.77 | 6 | 202336_s_at | NM_000919 | 5.59 | 14 | 1418908_at   | NM_013626 | 2.265 | 15 |
| PAM      | B 1367687_a_at | peptidylglycine alpha-amidating monooxygenase                             | AW534339              | 3.77 | 6 | 212958_x_at | AI022882  | 5.36 | 14 | 1418908_at   | NM_013626 | 2.265 | 15 |
| PAPSS2   | B 1376047_at   | 3'-phosphoadenosine 5'-phosphosulfate synthase 2 (predicted)              | BI285321              | 5.84 | 6 | 203058_s_at | AW299958  | 10.3 | 14 | 1421987_at   | BF786072  | 7.396 | 17 |
| PAPSS2   | B 1376047_at   | 3'-phosphoadenosine 5'-phosphosulfate synthase 2 (predicted)              | BI285321              | 5.84 | 6 | 203060_s_at | AF074331  | 8.86 | 14 | 1434510_at   | BF780807  | 3.808 | 15 |
| PAPSS2   | B 1376047_at   | 3'-phosphoadenosine 5'-phosphosulfate synthase 2 (predicted)              | BI285321              | 5.84 | 6 | 203059_s_at | NM_004670 | 4.08 | 14 | 1421989_s_at | BF786072  | 5.349 | 17 |

|            |   |              |                                                                         |           |      |    |             |           |      |    |              |           |         |    |
|------------|---|--------------|-------------------------------------------------------------------------|-----------|------|----|-------------|-----------|------|----|--------------|-----------|---------|----|
| PAX6       | B | 1369242_at   | paired box gene 6                                                       | NM_013001 | 15.4 | 4  | 205646_s_at | NM_000280 | 17.4 | 14 | 1452526_a_at | AF443223  | 9.312   | 15 |
| PAX6       | B | 1369242_at   | paired box gene 6                                                       | NM_013001 | 15.4 | 4  | 205646_s_at | NM_000280 | 17.4 | 14 | 1419271_at   | BC011272  | 6.937   | 15 |
| PAX6       | B | 1369242_at   | paired box gene 6                                                       | NM_013001 | 15.4 | 4  | 205646_s_at | NM_000280 | 17.4 | 14 | 1425960_s_at | AF457142  | 4.103   | 17 |
| PCLO       | A | 1387399_at   | piccolo (presynaptic cytomatrix protein)                                | AF138789  | 1.43 | 6  | 213558_at   | AB011131  | 2.69 | 8  | 1452423_at   | AW493746  | 6.142   | 17 |
| PCLO       | A | 1387399_at   | piccolo (presynaptic cytomatrix protein)                                | AF138789  | 1.43 | 6  | 210650_s_at | BC001304  | 1.64 | 8  | 1419392_at   | NM_011995 | 4.19    | 15 |
| PCSK1      | B | 1368559_at   | proprotein convertase subtilisin/kexin type 1                           | M83745    | 22.3 | 6  | 205825_at   | NM_000439 | 17.3 | 14 | 1421396_at   | M69196    | 28.62   | 17 |
| PCSK1      | B | 1387247_at   | proprotein convertase subtilisin/kexin type 1                           | M83745    | 21.6 | 6  | 205825_at   | NM_000439 | 17.3 | 14 | 1421396_at   | M69196    | 28.62   | 17 |
| PCSK2      | B | 1387155_at   | proprotein convertase subtilisin/kexin type 2                           | NM_012746 | 15.5 | 4  | 204869_at   | AL031664  | 7.31 | 14 | 1447991_at   | AI839700  | 44.29   | 17 |
| PCSK2      | B | 1387155_at   | proprotein convertase subtilisin/kexin type 2                           | NM_012746 | 15.5 | 4  | 204870_s_at | NM_002594 | 15.4 | 14 | 1448312_at   | NM_008792 | 17.11   | 17 |
| PCSK2      | B | 1387155_at   | proprotein convertase subtilisin/kexin type 2                           | NM_012746 | 15.5 | 4  | 204869_at   | AL031664  | 7.31 | 14 | 1447992_s_at | AI839700  | 24.52   | 17 |
| PCSK2      | B | 1387155_at   | proprotein convertase subtilisin/kexin type 2                           | NM_012746 | 15.5 | 4  | 204869_at   | AL031664  | 7.31 | 14 | 1428305_at   | AK018159  | 21.61   | 17 |
| PCSK2      | B | 1387155_at   | proprotein convertase subtilisin/kexin type 2                           | NM_012746 | 15.5 | 4  | 204869_at   | AL031664  | 7.31 | 14 | 1444147_at   | BB357975  | 5.453   | 17 |
| PDGFRL     |   | 1374616_at   | platelet-derived growth factor receptor-like (predicted)                | BM384311  | 1.35 | 4  | 205226_at   | NM_006207 | 2.04 | 8  | 1428896_at   | AK004179  | 2.982   | 15 |
| PDIA3 / GR | C | 1398788_at   | protein disulfide isomerase associated 3 (glucose regulated protein, 58 | NM_017319 | 2.67 | 6  | 208612_at   | D83485    | 2.16 | 14 | 1445330_at   | BG916492  | 2.195   | 17 |
| PDIA6      | C | 1370859_at   | protein disulfide isomerase associated 6 (thioredoxin domain containin  | BI284965  | 2.79 | 6  | 216640_s_at | AK026926  | 2.31 | 14 | 1423648_at   |           | 3.716   | 17 |
| PDIA6      | C | 1370859_at   | protein disulfide isomerase associated 6 (thioredoxin domain containin  | BI284965  | 2.79 | 6  | 207668_x_at | NM_005742 | 2.31 | 14 | 1423648_at   |           | 0 3.716 | 17 |
| PDIA6      | C | 1370859_at   | protein disulfide isomerase associated 6 (thioredoxin domain containin  | BI284965  | 2.79 | 6  | 208639_x_at | BC001312  | 2.26 | 14 | 1423648_at   |           | 0 3.716 | 17 |
| PDIA6      | C | 1370859_at   | protein disulfide isomerase associated 6 (thioredoxin domain containin  | BI284965  | 2.79 | 6  | 208638_at   | BE910010  | 1.75 | 14 | 1423648_at   |           | 0 3.716 | 17 |
| PDX1       |   | 1369516_at   | pancreatic and duodenal homeobox gene 1                                 | NM_022852 | 3.42 | 6  | 210937_s_at | U35632    | 1.18 | 10 | 1422174_at   | AK020261  | 47.04   | 17 |
| PDX1       |   | 1369516_at   | pancreatic and duodenal homeobox gene 1                                 | NM_022852 | 3.42 | 6  | 210937_s_at | U35632    | 1.18 | 10 | 1422173_at   | AK020261  | 12.43   | 17 |
| PFKFB2     | B | 1388044_at   | 6-phosphofructo-2-kinase/fructose-2,6-biphosphatase 2                   | L27084    | 4.33 | 6  | 209992_at   | AB044805  | 2.26 | 14 | 1422092_at   | BC018418  | 9.607   | 17 |
| PFKFB2     | B | 1369400_a_at | 6-phosphofructo-2-kinase/fructose-2,6-biphosphatase 2                   | NM_080477 | 1.73 | 6  | 207931_s_at | NM_006212 | 1.36 | 12 | 1422090_a_at | BC018418  | 5.204   | 17 |
| PFKFB2     | B | 1369400_a_at | 6-phosphofructo-2-kinase/fructose-2,6-biphosphatase 2                   | NM_080477 | 1.73 | 6  | 207931_s_at | NM_006212 | 1.36 | 12 | 1422091_at   | BC018418  | 3.504   | 15 |
| PGCP       |   | 1368399_a_at | plasma glutamate carboxypeptidase                                       | NM_031640 | 1.82 | 2  | 208454_s_at | NM_016134 | 1.5  | 14 | 1416441_at   | BB468025  | 3.014   | 17 |
| PGCP       |   | 1368399_a_at | plasma glutamate carboxypeptidase                                       | NM_031640 | 1.82 | 2  | 203501_at   | NM_006102 | 1.3  | 10 | 1416441_at   | BB468025  | 3.014   | 17 |
| PGRMC2     | C | 1388531_at   | progesterone receptor membrane component 2 (predicted)                  | BF283382  | 1.67 | 4  | 201701_s_at | NM_006320 | 2.21 | 12 | 1448233_at   | BE630020  | 2.349   | 15 |
| PGRMC2     | C | 1388531_at   | progesterone receptor membrane component 2 (predicted)                  | BF283382  | 1.67 | 4  | 213227_at   | BE879873  | 1.77 | 14 | 1452882_at   | BF322962  | 2.126   | 17 |
| PICALM     |   | 1369452_a_at | phosphatidylinositol binding clathrin assembly protein                  | NM_053554 | 1.4  | 6  | 215832_x_at | AV722190  | 1.48 | 14 | 1443218_at   | BB206107  | 2.015   | 17 |
| PITX3      |   | 1370222_at   | paired-like homeodomain transcription factor 3                          | AI145840  | 1.53 | 4  | 208277_at   | NM_005029 | 1.31 | 12 | 1449917_at   | NM_008852 | 2.733   | 17 |
| PJA2       |   | 1375421_a_at | praja 2, RING-H2 motif containing                                       | AI600019  | 1.93 | 2  | 201133_s_at | AA142966  | 1.43 | 10 | 1424442_a_at | BC017130  | 3.494   | 17 |
| PJA2       | B | 1387903_at   | praja 2, RING-H2 motif containing                                       | D32249    | 1.4  | 2  | 201133_s_at | AA142966  | 1.43 | 10 | 1424442_a_at | BC017130  | 3.494   | 17 |
| PLCB4      | B | 1386962_at   | phospholipase C, beta 4                                                 | NM_024353 | 1.54 | -2 | 203895_at   | AL535113  | 2.63 | 12 | 1421987_at   | BF786072  | 7.396   | 17 |
| POFUT2     | C | 1390590_at   | protein O-fucosyltransferase 2 (predicted)                              | AA965207  | 1.68 | 6  | 209578_s_at | BC000626  | 1.6  | 12 | 1435056_x_at | BB699319  | 2.464   | 15 |
| POFUT2     | C | 1388717_at   | protein O-fucosyltransferase 2 (predicted)                              | BM384163  | 1.7  | 6  | 209578_s_at | BC000626  | 1.6  | 12 | 1416573_at   | BC018194  | 1.854   | 17 |
| PPP1R1A    | B | 1386968_at   | protein phosphatase 1, regulatory (inhibitor) subunit 1A                | NM_022676 | 10   | 6  | 205478_at   | NM_006741 | 8.52 | 12 | 1422605_at   | NM_021391 | 4.05    | 13 |
| PPP2R1B    |   | 1373959_at   | protein phosphatase 2 (formerly 2A), regulatory subunit A (PR 65), bet  | AI411788  | 1.85 | 2  | 202886_s_at | M65254    | 2.2  | 14 | 1428265_at   | AK010754  | 1.682   | 15 |
| PPP2R1B    |   | 1373959_at   | protein phosphatase 2 (formerly 2A), regulatory subunit A (PR 65), bet  | AI411788  | 1.85 | 2  | 202884_s_at | NM_002716 | 1.46 | 10 | 1428265_at   | AK010754  | 1.682   | 15 |
| PRKACB     | C | 1370746_at   | protein kinase, cAMP dependent, catalytic, beta (predicted)             | D10770    | 2.23 | 2  | 202741_at   | AA130247  | 2.91 | 8  | 1420610_at   | AV024339  | 3.263   | 15 |
| PRKACB     | C | 1371835_at   | protein kinase, cAMP dependent, catalytic, beta (predicted)             | AI411907  | 1.7  | 0  | 202742_s_at | NM_002731 | 3.24 | 10 | 1420611_at   | AV024339  | 2.209   | 15 |
| PRKAR1A    | C | 1386905_at   | protein kinase, cAMP dependent regulatory, type I, alpha                | NM_013181 | 1.57 | 4  | 200604_s_at | M18468    | 2.42 | 10 | 1447635_at   | BB410911  | 3.689   | 17 |
| PRKAR1A    | C | 1386905_at   | protein kinase, cAMP dependent regulatory, type I, alpha                | NM_013181 | 1.57 | 4  | 200605_s_at | NM_002734 | 1.78 | 10 | 1425550_a_at | BC005697  | 1.875   | 15 |
| PRNP       | A | 1370156_at   | prion protein                                                           | BI278802  | 6.31 | 6  | 215707_s_at | AV725328  | 1.21 | 8  | 1416130_at   | BE630020  | 2.294   | 13 |
| PRPS1      | C | 1368165_at   | phosphoribosyl pyrophosphate synthetase 1                               | M29392    | 1.75 | 6  | 208447_s_at | NM_002764 | 1.28 | 10 | 1416052_at   | AK011304  | 2.404   | 17 |
| PRPS1      | C | 1387085_at   | phosphoribosyl pyrophosphate synthetase 1                               | M29392    | 1.82 | 6  | 209440_at   | BC001605  | 1.85 | 10 | 1448192_s_at | AK011304  | 1.606   | 15 |
| PTK2       | A | 1394338_x_at | PTK2 protein tyrosine kinase 2                                          | BF290004  | 1.35 | 6  | 208820_at   | AL037339  | 1.48 | 10 | 1430827_x_at | AV301702  | 2.484   | 17 |
| PTK2       | A | 1394338_x_at | PTK2 protein tyrosine kinase 2                                          | BF290004  | 1.35 | 6  | 207821_s_at | NM_005607 | 1.21 | 10 | 1430827_a_at | AV301702  | 2.484   | 17 |
| PTPRF      |   | 1368035_a_at | protein tyrosine phosphatase, receptor type, F                          | X83505    | 3.23 | 2  | 200635_s_at | AU145351  | 1.36 | 8  | 1420842_at   | BF235516  | 2.247   | 15 |
| PTPRF      |   | 1368035_a_at | protein tyrosine phosphatase, receptor type, F                          | X83505    | 3.23 | 2  | 200635_s_at | AU145351  | 1.36 | 8  | 1420841_at   | BF235516  | 1.817   | 13 |
| PTPRF      |   | 1368036_at   | protein tyrosine phosphatase, receptor type, F                          | M60103    | 1.79 | 4  | 200637_s_at | AI762627  | 1.68 | 12 | 1420843_at   | BF235516  | 2.462   | 15 |
| PTPRN      |   | 1370362_at   | protein tyrosine phosphatase, receptor type, N                          | D45414    | 4.6  | 6  | 204945_at   | NM_002846 | 8.66 | 14 | 1416588_at   | NM_008985 | 5.366   | 15 |



|               |   |              |                                                                          |           |      |   |             |           |      |    |              |           |       |    |
|---------------|---|--------------|--------------------------------------------------------------------------|-----------|------|---|-------------|-----------|------|----|--------------|-----------|-------|----|
| <b>PTPRN2</b> | A | 1370182_at   | protein tyrosine phosphatase, receptor type, N polypeptide 2             | AI574884  | 12.5 | 6 | 203029_s_at | NM_002847 | 7    | 14 | 1425724_at   | U57345    | 1.428 | 17 |
| <b>PTPRN2</b> | A | 1370182_at   | protein tyrosine phosphatase, receptor type, N polypeptide 2             | AI574884  | 12.5 | 6 | 203030_s_at | AF007555  | 5.32 | 14 | 1425724_at   | U57345    | 1.428 | 17 |
| <b>PTPRN2</b> | A | 1370182_at   | protein tyrosine phosphatase, receptor type, N polypeptide 2             | AI574884  | 12.5 | 6 | 211534_x_at | U65065    | 1.44 | 12 | 1425724_at   | U57345    | 1.428 | 17 |
| <b>RAB14</b>  | C | 1367884_at   | RAB14, member RAS oncogene family                                        | NM_053589 | 1.36 | 0 | 211503_s_at | AF112206  | 1.26 | 10 | 1419245_at   | AV339290  | 2.42  | 17 |
| <b>RAB1A</b>  | C | 1398841_at   | RAB1, member RAS oncogene family                                         | AI411122  | 1.62 | 6 | 207791_s_at | NM_004161 | 1.95 | 12 | 1416082_at   | AW108405  | 1.627 | 15 |
| <b>RAB1A</b>  | C | 1373022_at   | RAB1, member RAS oncogene family                                         | AI231860  | 1.94 | 4 | 208724_s_at | BC000905  | 1.37 | 14 | 1416082_at   | AW108405  | 1.627 | 15 |
| <b>RAB2A</b>  | B | 1370087_at   | RAB2, member RAS oncogene family                                         | NM_031718 | 1.42 | 6 | 208731_at   | AU158062  | 1.82 | 10 | 1418623_at   | NM_021518 | 1.91  | 15 |
| <b>RAB2A</b>  | B | 1370087_at   | RAB2, member RAS oncogene family                                         | NM_031718 | 1.42 | 6 | 208732_at   | AI743756  | 1.34 | 8  | 1418623_at   | NM_021518 | 1.91  | 15 |
| <b>RAB2A</b>  | B | 1370087_at   | RAB2, member RAS oncogene family                                         | NM_031718 | 1.42 | 6 | 208733_at   | AW301641  | 1.31 | 10 | 1418623_at   | NM_021518 | 1.91  | 15 |
| <b>RAB2A</b>  | B | 1370087_at   | RAB2, member RAS oncogene family                                         | NM_031718 | 1.42 | 6 | 208734_x_at | M28213    | 1.62 | 14 | 1419946_s_at | C80220    | 1.566 | 15 |
| <b>RAB3B</b>  |   | 1370061_at   | RAB3B, member RAS oncogene family                                        | NM_031091 | 1.94 | 4 | 205924_at   | BC005035  | 4.64 | 14 | 1422583_at   | NM_023537 | 2.52  | 13 |
| <b>RAB3B</b>  |   | 1370061_at   | RAB3B, member RAS oncogene family                                        | NM_031091 | 1.94 | 4 | 205925_s_at | NM_002867 | 2.63 | 14 | 1422583_at   | NM_023537 | 2.52  | 13 |
| <b>RANBP2</b> |   | 1375371_at   | similar to Ran-binding protein 2 (predicted)                             | BI296662  | 1.39 | 4 | 201713_s_at | D42063    | 2.44 | 14 | 1440104_at   | BB208180  | 5.203 | 17 |
| <b>RANBP2</b> |   | 1375371_at   | similar to Ran-binding protein 2 (predicted)                             | BI296662  | 1.39 | 4 | 201711_x_at | AI681120  | 1.62 | 8  | 1440104_at   | BB208180  | 5.203 | 17 |
| <b>RANBP2</b> |   | 1375371_at   | similar to Ran-binding protein 2 (predicted)                             | BI296662  | 1.39 | 4 | 201712_s_at | NM_006267 | 1.36 | 14 | 1440104_at   | BB208180  | 5.203 | 17 |
| <b>RBBP7</b>  | C | 1398768_at   | retinoblastoma binding protein 7                                         | NM_031816 | 1.45 | 4 | 201092_at   | NM_002893 | 1.44 | 10 | 1439131_at   | BB022577  | 2.616 | 17 |
| <b>RBM39</b>  | C | 1398993_at   | RNA-binding region (RNP1, RRM) containing 2 (predicted)                  | AI045458  | 1.63 | 2 | 208720_s_at | AI890947  | 1.24 | 10 | 1438398_at   | BB203348  | 3.594 | 17 |
| <b>RBM39</b>  | C | 1399101_at   | RNA-binding region (RNP1, RRM) containing 2 (predicted)                  | AA849715  | 1.51 | 2 | 208720_s_at | AI890947  | 1.24 | 10 | 1456386_at   | BB203348  | 2.437 | 15 |
| <b>RBM39</b>  | C | 1381967_at   | RNA-binding region (RNP1, RRM) containing 2 (predicted)                  | BE114972  | 1.48 | 2 | 208720_s_at | AI890947  | 1.24 | 10 | 1438420_at   | AV019076  | 1.886 | 13 |
| <b>RBM39</b>  | C | 1379737_a_at | RNA-binding region (RNP1, RRM) containing 2 (predicted)                  | BG372903  | 1.44 | 2 | 208720_s_at | AI890947  | 1.24 | 10 | 1438397_a_at | BB203348  | 1.785 | 15 |
| <b>RGS4</b>   | A | 1368505_at   | regulator of G-protein signaling 4                                       | U27767    | 5.5  | 6 | 204338_s_at | NM_005613 | 7.48 | 12 | 1416287_at   | NM_009062 | 8.283 | 15 |
| <b>RGS4</b>   | A | 1368505_at   | regulator of G-protein signaling 4                                       | U27767    | 5.5  | 6 | 204339_s_at | BC000737  | 5.6  | 12 | 1416286_at   | NM_009062 | 9.081 | 15 |
| <b>RGS4</b>   | A | 1368506_at   | regulator of G-protein signaling 4                                       | U27767    | 5.22 | 6 | 204337_at   | AL514445  | 9.12 | 12 | 1448285_at   | NM_009062 | 3.413 | 15 |
| <b>ROBO1</b>  | A | 1383767_at   | Roundabout homolog 1 (Drosophila)                                        | AW524430  | 1.4  | 6 | 213194_at   | BF059159  | 2.32 | 12 | 1427231_at   | BG065230  | 2.391 | 11 |
| <b>RPH3AL</b> | B | 1387176_at   | rabphilin 3A-like (without C2 domains)                                   | NM_133591 | 5.17 | 4 | 221614_s_at | BC005153  | 1.69 | 14 | 1431695_at   | AK018335  | 2.094 | 13 |
| <b>RRAGA</b>  | C | 1367736_at   | Ras-related GTP binding A                                                | NM_053973 | 1.71 | 6 | 201628_s_at | NM_006570 | 1.33 | 8  | 1428905_at   | AI118026  | 1.591 | 15 |
| <b>RRAGD</b>  | B | 1373427_at   | Ras-related GTP binding D (predicted)                                    | BI288816  | 1.41 | 2 | 221523_s_at | AL138717  | 5.61 | 12 | 1431164_at   | AK017818  | 3.236 | 17 |
| <b>RRAGD</b>  | B | 1373427_at   | Ras-related GTP binding D (predicted)                                    | BI288816  | 1.41 | 2 | 221524_s_at | AF272036  | 2.98 | 12 | 1431164_at   | AK017818  | 3.236 | 17 |
| <b>SC4MOL</b> |   | 1368275_at   | sterol-C4-methyl oxidase-like                                            | NM_080886 | 2.24 | 4 | 209146_at   | AV704962  | 2.23 | 8  | 1459627_at   | BG070057  | 3.978 | 17 |
| <b>SCFD1</b>  | C | 1368158_at   | sec1 family domain containing 1                                          | NM_019364 | 2.59 | 6 | 215548_s_at | AB020724  | 1.99 | 14 | 1428335_a_at | AK014070  | 1.852 | 15 |
| <b>SCG2</b>   | B | 1368044_at   | secretogranin 2                                                          | NM_022669 | 67.3 | 4 | 204035_at   | NM_003469 | 29   | 14 | 1450708_at   | NM_009129 | 22.92 | 17 |
| <b>SCG3</b>   | B | 1368656_at   | secretogranin III                                                        | NM_053856 | 31.6 | 4 | 219196_at   | NM_013243 | 53.4 | 14 | 1448628_at   | NM_009130 | 14.54 | 17 |
| <b>SCG5</b>   | B | 1367992_at   | secretory granule neuroendocrine protein 1                               | NM_013175 | 19.4 | 4 | 203889_at   | NM_003020 | 24.8 | 14 | 1423150_at   | AK019337  | 6.412 | 15 |
| <b>SCN3A</b>  | A | 1369691_at   | sodium channel, voltage-gated, type III, alpha polypeptide /// hypotheti | NM_013119 | 2.31 | 4 | 210432_s_at | AF225986  | 2.48 | 8  | 1439204_at   | BB096886  | 2.978 | 13 |
| <b>SEC22B</b> |   | 1389138_at   | SEC22 vesicle trafficking protein-like 1 (S. cerevisiae)                 | AA945574  | 2.51 | 6 | 209207_s_at | BC001364  | 1.83 | 14 | 1449063_at   | BC009024  | 2.326 | 17 |
| <b>SEC22B</b> |   | 1389138_at   | SEC22 vesicle trafficking protein-like 1 (S. cerevisiae)                 | AA945574  | 2.51 | 6 | 209206_at   | AV701283  | 1.56 | 12 | 1449063_at   | BC009024  | 2.326 | 17 |
| <b>SEC24D</b> | C | 1373610_at   | SEC24 related gene family, member D (S. cerevisiae) (predicted)          | AI232694  | 6.26 | 6 | 202375_at   | NM_014822 | 4.46 | 14 | 1426972_at   | AK009425  | 4.549 | 17 |
| <b>SEC61B</b> | C | 1382615_at   | Sec61 alpha 1 subunit (S. cerevisiae)                                    | BI284366  | 2.67 | 6 | 217716_s_at | NM_013336 | 1.53 | 12 | 1416190_a_at | BC003707  | 7.606 | 15 |
| <b>SEC61B</b> | C | 1382615_at   | Sec61 alpha 1 subunit (S. cerevisiae)                                    | BI284366  | 2.67 | 6 | 217716_s_at | NM_013336 | 1.53 | 12 | 1416191_at   | BC003707  | 5.271 | 15 |
| <b>SEC61B</b> | C | 1371368_at   | Sec61 alpha 1 subunit (S. cerevisiae)                                    | BI279499  | 3.81 | 6 | 217716_s_at | NM_013336 | 1.53 | 12 | 1434986_a_at | AI327023  | 1.852 | 15 |
| <b>SEC61B</b> | C | 1382615_at   | Sec61 alpha 1 subunit (S. cerevisiae)                                    | BI284366  | 2.67 | 6 | 217716_s_at | NM_013336 | 1.53 | 12 | 1416189_a_at | BC003707  | 2.089 | 15 |
| <b>SEC61B</b> | C | 1388519_at   | Sec61 beta subunit (predicted)                                           | BI281906  | 2.66 | 6 | 203133_at   | NM_006808 | 1.54 | 14 | 1417083_at   | NM_024171 | 1.563 | 15 |
| <b>SEC63</b>  | C | 1390115_at   | SEC63-like (S. cerevisiae) (predicted)                                   | BM384667  | 1.86 | 6 | 201916_s_at | NM_007214 | 1.73 | 12 | 1424926_at   | C76103    | 4.32  | 17 |
| <b>SEC63</b>  | C | 1390115_at   | SEC63-like (S. cerevisiae) (predicted)                                   | BM384667  | 1.86 | 6 | 201914_s_at | AK001465  | 1.59 | 12 | 1424925_at   | C76103    | 2.988 | 17 |
| <b>SEC63</b>  | C | 1390115_at   | SEC63-like (S. cerevisiae) (predicted)                                   | BM384667  | 1.86 | 6 | 201914_s_at | AK001465  | 1.59 | 12 | 1424924_at   | C76103    | 1.778 | 13 |
| <b>SEPT2</b>  | C | 1388389_at   | septin 2                                                                 | BF282620  | 1.54 | 4 | 200015_s_at | NM_004404 | 1.32 | 10 | 1423473_at   | AV304911  | 1.705 | 17 |
| <b>SEPT2</b>  | C | 1368984_at   | septin 2                                                                 | NM_057148 | 1.92 | 6 | 200778_s_at | AI191427  | 1.61 | 14 | 1423473_at   | AV304911  | 1.705 | 17 |
| <b>SEZ6L2</b> |   | 1374825_at   | seizure related 6 homolog (mouse)-like 2 (predicted)                     | BG380338  | 2.24 | 6 | 218720_x_at | NM_012410 | 1.24 | 8  | 1434641_x_at | AW121511  | 6.872 | 15 |
| <b>SEZ6L2</b> |   | 1374825_at   | seizure related 6 homolog (mouse)-like 2 (predicted)                     | BG380338  | 2.24 | 6 | 218720_x_at | NM_012410 | 1.24 | 8  | 1423983_at   | BC011475  | 5.546 | 15 |
| <b>SFRS10</b> | C | 1370189_at   | splicing factor, arginine/serine-rich 10 (transformer 2 homolog, Drosop  | BI290979  | 1.66 | 4 | 200892_s_at | BC000451  | 1.21 | 8  | 1446496_at   | BB219075  | 1.782 | 17 |

|                  |   |              |                                                                          |           |      |    |             |           |      |    |              |           |       |    |
|------------------|---|--------------|--------------------------------------------------------------------------|-----------|------|----|-------------|-----------|------|----|--------------|-----------|-------|----|
| <b>SFRS10</b>    | C | 1370188_at   | splicing factor, arginine/serine-rich 10 (transformer 2 homolog, Drosop  | BI290979  | 1.79 | 4  | 200892_s_at | BC000451  | 1.21 | 8  | 1441466_at   | BG066615  | 1.508 | 15 |
| <b>SLC18A1</b>   | A | 1387999_at   | solute carrier family 18 (vesicular monoamine), member 1                 | M97380    | 1.4  | 6  | 207074_s_at | NM_003053 | 1.17 | 10 | 1458777_at   | BG068849  | 7.459 | 17 |
| <b>SLC2A2</b>    |   | 1387228_at   | solute carrier family 2 (facilitated glucose transporter), member 2      | NM_012879 | 28.6 | 6  | 206535_at   | NM_000340 | 5.47 | 8  | 1449067_at   | NM_031197 | 4.311 | 13 |
| <b>SLC35B1</b>   | B | 1377143_at   | solute carrier family 35, member B1                                      | BM388792  | 2.42 | 6  | 202433_at   | NM_005827 | 1.45 | 14 | 1448769_at   | NM_016972 | 2.512 | 17 |
| <b>SLC7A2</b>    |   | 1369460_at   | solute carrier family 7 (cationic amino acid transporter, y+ system), me | NM_022619 | 2.35 | 4  | 207626_s_at | NM_003046 | 1.62 | 12 | 1426008_a_at | M62838    | 3.764 | 15 |
| <b>SLC7A2</b>    |   | 1369460_at   | solute carrier family 7 (cationic amino acid transporter, y+ system), me | NM_022619 | 2.35 | 4  | 207626_s_at | NM_003046 | 1.62 | 12 | 1422648_at   | BF533509  | 3.524 | 15 |
| <b>SLC7A2</b>    |   | 1369460_at   | solute carrier family 7 (cationic amino acid transporter, y+ system), me | NM_022619 | 2.35 | 4  | 207626_s_at | NM_003046 | 1.62 | 12 | 1440506_at   | BB433596  | 1.831 | 15 |
| <b>SLC7A8</b>    | B | 1387057_at   | solute carrier family 7 (cationic amino acid transporter, y+ system), me | NM_053442 | 4.59 | 4  | 217248_s_at | AL365343  | 2.56 | 12 | 1417929_at   | NM_016972 | 2.66  | 17 |
| <b>SLC7A8</b>    | B | 1387057_at   | solute carrier family 7 (cationic amino acid transporter, y+ system), me | NM_053442 | 4.59 | 4  | 202752_x_at | NM_012244 | 1.79 | 12 | 1417929_at   | NM_016972 | 2.66  | 17 |
| <b>SLC7A8</b>    | B | 1387057_at   | solute carrier family 7 (cationic amino acid transporter, y+ system), me | NM_053442 | 4.59 | 4  | 216092_s_at | AL365347  | 1.65 | 12 | 1417929_at   | NM_016972 | 2.66  | 17 |
| <b>SMARCA2</b>   | C | 1376337_at   | SWI/SNF related, matrix associated, actin dependent regulator of chro    | AI170385  | 1.59 | 4  | 206542_s_at | AV725365  | 2.29 | 10 | 1452333_at   | BM230202  | 1.781 | 17 |
| <b>SMARCA2</b>   | C | 1376337_at   | SWI/SNF related, matrix associated, actin dependent regulator of chro    | AI170385  | 1.59 | 4  | 206544_x_at | NM_003070 | 2.27 | 12 | 1452333_at   | BM230202  | 1.781 | 17 |
| <b>SMARCA2</b>   | C | 1376337_at   | SWI/SNF related, matrix associated, actin dependent regulator of chro    | AI170385  | 1.59 | 4  | 217707_x_at | AI535683  | 1.58 | 10 | 1452333_at   | BM230202  | 1.781 | 17 |
| <b>SND1</b>      | C | 1367790_at   | staphylococcal nuclease domain containing 1                              | NM_022694 | 2.05 | 6  | 201622_at   | NM_014390 | 1.72 | 14 | 1437036_at   | BB240087  | 5.873 | 17 |
| <b>SND1</b>      | C | 1367790_at   | staphylococcal nuclease domain containing 1                              | NM_022694 | 2.05 | 6  | 201622_at   | NM_014390 | 1.72 | 14 | 1437037_x_at | BB240087  | 3.261 | 17 |
| <b>SND1</b>      | C | 1367790_at   | staphylococcal nuclease domain containing 1                              | NM_022694 | 2.05 | 6  | 201622_at   | NM_014390 | 1.72 | 14 | 1416038_at   | NM_019776 | 1.729 | 13 |
| <b>SNRPN III</b> | A | 1368098_a_at | small nuclear ribonucleoprotein N                                        | M29294    | 1.56 | 2  | 206042_x_at | NM_022804 | 3.04 | 10 | 1415896_x_at |           | 3.635 | 17 |
| <b>SNRPN III</b> | A | 1368098_a_at | small nuclear ribonucleoprotein N                                        | M29294    | 1.56 | 2  | 221974_at   | AW770748  | 2.61 | 10 | 1435716_x_at |           | 1.064 | 9  |
| <b>SOCS2</b>     |   | 1369577_at   | suppressor of cytokine signaling 2                                       | NM_058208 | 2.42 | 6  | 203372_s_at | AB004903  | 2.13 | 12 | 1449109_at   | NM_007706 | 1.914 | 13 |
| <b>SOCS2</b>     |   | 1369577_at   | suppressor of cytokine signaling 2                                       | NM_058208 | 2.42 | 6  | 203373_x_at | NM_003877 | 1.47 | 12 | 1449109_at   | NM_007706 | 1.914 | 13 |
| <b>SORL1</b>     | C | 1393933_at   | sortilin-related receptor, L(DLR class) A repeats-containing (predicted) | AW144823  | 4.02 | 4  | 212560_at   | AV728268  | 3.99 | 10 | 1445889_at   | BE980129  | 1.997 | 17 |
| <b>SORL1</b>     | C | 1377457_a_at | sortilin-related receptor, L(DLR class) A repeats-containing (predicted) | AA850618  | 3.38 | 4  | 212560_at   | AV728268  | 3.99 | 10 | 1460390_at   | BI648081  | 1.512 | 15 |
| <b>SORL1</b>     | C | 1386269_x_at | sortilin-related receptor, L(DLR class) A repeats-containing (predicted) | AI177589  | 3.36 | 4  | 212560_at   | AV728268  | 3.99 | 10 | 1460390_at   | BI648081  | 1.512 | 15 |
| <b>SORL1</b>     | C | 1390710_x_at | sortilin-related receptor, L(DLR class) A repeats-containing (predicted) | AA850618  | 2.02 | 4  | 212560_at   | AV728268  | 3.99 | 10 | 1460390_at   | BI648081  | 1.512 | 15 |
| <b>SORL1</b>     | C | 1377458_at   | sortilin-related receptor, L(DLR class) A repeats-containing (predicted) | AA850618  | 1.94 | 4  | 212560_at   | AV728268  | 3.99 | 10 | 1460390_at   | BI648081  | 1.512 | 15 |
| <b>SQLE</b>      |   | 1387017_at   | squalene epoxidase                                                       | NM_017136 | 1.81 | -2 | 209218_at   | AF098865  | 1.84 | 10 | 1415993_at   | NM_009270 | 2.336 | 15 |
| <b>SQLE</b>      |   | 1387017_at   | squalene epoxidase                                                       | NM_017136 | 1.81 | -2 | 213562_s_at | BF979497  | 1.49 | 8  | 1415993_at   | NM_009270 | 2.336 | 15 |
| <b>SQSTM1</b>    | C | 1375374_at   | Sequestosome 1                                                           | BF400606  | 3    | 4  | 201471_s_at | NM_003900 | 2.23 | 14 | 1444021_at   | AW741388  | 3.21  | 17 |
| <b>SQSTM1</b>    | C | 1389381_at   | sequestosome 1                                                           | AI411586  | 2.56 | 4  | 213112_s_at | N30649    | 1.33 | 14 | 1444021_at   | AW741388  | 3.21  | 17 |
| <b>SQSTM1</b>    | C | 1371353_at   | sequestosome 1                                                           | BG663093  | 1.56 | 4  | 201471_s_at | NM_003900 | 2.23 | 14 | 1444021_at   | AW741388  | 3.21  | 17 |
| <b>SRP72</b>     | C | 1375552_at   | signal recognition particle,72 kDa subunit                               | BG372976  | 3.25 | 6  | 208095_s_at | NM_001222 | 2.01 | 14 | 1428876_at   | BM942773  | 2.247 | 17 |
| <b>SRP72</b>     | C | 1375552_at   | signal recognition particle,72 kDa subunit                               | BG372976  | 3.25 | 6  | 208800_at   | AV702627  | 1.54 | 12 | 1428876_at   | BM942773  | 2.247 | 17 |
| <b>SRP72</b>     | C | 1375552_at   | signal recognition particle,72 kDa subunit                               | BG372976  | 3.25 | 6  | 208801_at   | BE856385  | 1.52 | 12 | 1428876_at   | BM942773  | 2.247 | 17 |
| <b>SRP72</b>     | C | 1375552_at   | signal recognition particle,72 kDa subunit                               | BG372976  | 3.25 | 6  | 208802_at   | AI493872  | 1.19 | 10 | 1428877_at   | BM942773  | 1.931 | 17 |
| <b>SRP9</b>      | C | 1372445_at   | Signal recognition particle 9 kDa protein (SRP9)                         | AI171783  | 2.25 | 6  | 201273_s_at | NM_003133 | 1.3  | 10 | 1448753_at   | BI661964  | 1.878 | 15 |
| <b>SRPR</b>      | C | 1371343_at   | signal recognition particle receptor ('docking protein') (predicted)     | BM391232  | 2.71 | 6  | 200918_s_at | NM_003139 | 2.02 | 14 | 1423670_a_at | BC021839  | 3.12  | 17 |
| <b>SRPR</b>      | C | 1371343_at   | signal recognition particle receptor ('docking protein') (predicted)     | BM391232  | 2.71 | 6  | 200917_s_at | BG474541  | 1.28 | 10 | 1423670_a_at | BC021839  | 3.12  | 17 |
| <b>SSR1</b>      | C | 1373090_at   | signal sequence receptor, alpha (predicted)                              | AI230697  | 2.5  | 6  | 200889_s_at | AI016620  | 2.67 | 14 | 1441327_a_at | AV325051  | 3.343 | 17 |
| <b>SSR1</b>      | C | 1373090_at   | signal sequence receptor, alpha (predicted)                              | AI230697  | 2.5  | 6  | 200890_s_at | AW006345  | 2.09 | 14 | 1441327_a_at | AV325051  | 3.343 | 17 |
| <b>SSR1</b>      | C | 1373090_at   | signal sequence receptor, alpha (predicted)                              | AI230697  | 2.5  | 6  | 200891_s_at | NM_003144 | 2.12 | 14 | 1448843_at   | BG077348  | 2.228 | 13 |
| <b>SSR2</b>      | C | 1373185_at   | signal sequence receptor, beta (predicted)                               | BE329347  | 1.94 | 4  | 200652_at   | NM_003145 | 1.49 | 8  | 1449930_a_at | NM_025448 | 1.555 | 13 |
| <b>SSR4</b>      | C | 1367690_at   | signal sequence receptor 4                                               | NM_017199 | 2.49 | 6  | 201004_at   | NM_006280 | 2.84 | 14 | 1427096_s_at | AV051818  | 2.458 | 17 |
| <b>SSTR2</b>     | A | 1371174_s_at | somatostatin receptor 2                                                  | X98234    | 1.4  | 4  | 217455_s_at | AF184174  | 1.97 | 12 | 1422256_at   | NM_009217 | 1.947 | 15 |
| <b>ST18</b>      | B | 1370658_a_at | suppression of tumorigenicity 18                                         | AF031942  | 4.87 | 6  | 206135_at   | NM_014682 | 11.7 | 12 | 1455123_at   | BB178719  | 22.07 | 17 |
| <b>ST18</b>      | B | 1370658_a_at | suppression of tumorigenicity 18                                         | AF031942  | 4.87 | 6  | 206135_at   | NM_014682 | 11.7 | 12 | 1436793_at   | AV347235  | 2.785 | 17 |
| <b>STAU2</b>     | A | 1390558_at   | staufen, RNA binding protein, homolog 2 (Drosophila)                     | AI502229  | 2.63 | 4  | 204226_at   | NM_014393 | 1.27 | 8  | 1425533_a_at | AJ244015  | 2.576 | 17 |
| <b>STAU2</b>     | A | 1390558_at   | staufen, RNA binding protein, homolog 2 (Drosophila)                     | AI502229  | 2.63 | 4  | 204226_at   | NM_014393 | 1.27 | 8  | 1450916_at   | AI843206  | 2.557 | 15 |
| <b>STCH</b>      | C | 1372368_at   | Stress 70 protein chaperone, microsomal-associated, 60kD human hor       | AI230431  | 3.57 | 6  | 202558_s_at | NM_006948 | 2.72 | 14 | 1453172_at   | BE533039  | 17.34 | 17 |
| <b>STCH</b>      | C | 1368844_at   | stress 70 protein chaperone, microsomal-associated, 60kD human hor       | NM_019271 | 2.42 | 6  | 202557_at   | AI718418  | 2.62 | 12 | 1430026_at   | AK021006  | 8.187 | 17 |
| <b>STCH</b>      | C | 1368844_at   | stress 70 protein chaperone, microsomal-associated, 60kD human hor       | NM_019271 | 2.42 | 6  | 202557_at   | AI718418  | 2.62 | 12 | 1433772_at   | BE650268  | 2.426 | 15 |

|                |   |              |                                                                          |           |      |   |             |           |      |    |              |           |       |    |
|----------------|---|--------------|--------------------------------------------------------------------------|-----------|------|---|-------------|-----------|------|----|--------------|-----------|-------|----|
| <b>STCH</b>    | C | 1368844_at   | stress 70 protein chaperone, microsome-associated, 60kD human hom        | NM_019271 | 2.42 | 6 | 202557_at   | AI718418  | 2.62 | 12 | 1429502_at   | BE533039  | 2.156 | 17 |
| <b>STXBP1</b>  | A | 1370518_a_at | syntaxin binding protein 1                                               | U06069    | 4.21 | 4 | 202260_s_at | NM_003165 | 5.62 | 8  | 1420506_a_at | AF326545  | 9.613 | 17 |
| <b>STXBP1</b>  | A | 1398330_at   | syntaxin binding protein 1                                               | BM388715  | 2.12 | 4 | 202260_s_at | NM_003165 | 5.62 | 8  | 1420506_a_at | AF326545  | 9.613 | 17 |
| <b>STXBP1</b>  | A | 1370519_at   | syntaxin binding protein 1                                               | U06069    | 2.74 | 4 | 202260_s_at | NM_003165 | 5.62 | 8  | 1420505_a_at | AF326545  | 2.406 | 13 |
| <b>SYP</b>     | A | 1368276_at   | synaptophysin                                                            | NM_012664 | 1.75 | 2 | 213200_at   | U93305    | 2.59 | 8  | 1448280_at   | NM_009305 | 1.691 | 13 |
| <b>TAF9B</b>   | B | 1368429_at   | TAF9-like RNA polymerase II, TATA box binding protein (TBP)-associa      | NM_133615 | 1.49 | 2 | 221618_s_at | AF220509  | 1.44 | 12 | 1434960_at   | AW555571  | 2.848 | 17 |
| <b>TAF9B</b>   | B | 1368429_at   | TAF9-like RNA polymerase II, TATA box binding protein (TBP)-associa      | NM_133615 | 1.49 | 2 | 221618_s_at | AF220509  | 1.44 | 12 | 1447829_x_at | BB431174  | 2.221 | 17 |
| <b>TARS</b>    | C | 1372145_at   | threonyl-tRNA synthetase                                                 | BI289683  | 1.59 | 2 | 201263_at   | NM_003191 | 2.24 | 12 | 1460323_at   | AK010256  | 1.944 | 17 |
| <b>TCTA</b>    |   | 1372507_at   | T-cell leukemia translocation altered gene                               | AA901093  | 1.57 | 6 | 203054_s_at | NM_022171 | 1.33 | 14 | 1420123_at   | C85065    | 2.286 | 17 |
| <b>TERF2IP</b> |   | 1388780_at   | telomeric repeat binding factor 2, interacting protein (predicted)       | BF395792  | 2.17 | 6 | 201174_s_at | NM_018975 | 2.12 | 8  | 1419381_at   | NM_020584 | 1.675 | 13 |
| <b>TGOLN2</b>  |   | 1371028_at   | trans-golgi network protein 2                                            | AW917192  | 2.32 | 6 | 212040_at   | BG249599  | 1.94 | 14 | 1423307_s_at | AI314055  | 1.617 | 15 |
| <b>TGOLN2</b>  |   | 1389965_at   | trans-golgi network protein 2                                            | AA799818  | 1.63 | 4 | 203833_s_at | BF061845  | 1.65 | 14 | 1423307_s_at | AI314055  | 1.617 | 15 |
| <b>TGOLN2</b>  |   | 1387755_s_at | trans-golgi network protein 2                                            | NM_138840 | 1.63 | 6 | 212043_at   | W72053    | 1.57 | 12 | 1423307_s_at | AI314055  | 1.617 | 15 |
| <b>TGOLN2</b>  |   | 1389965_at   | trans-golgi network protein 2                                            | AA799818  | 1.63 | 4 | 203834_s_at | NM_006464 | 1.23 | 10 | 1423307_s_at | AI314055  | 1.617 | 15 |
| <b>TLE1</b>    |   | 1374425_at   | transducin-like enhancer of split 1, homolog of Drosophila E(spl) (predi | BG380534  | 2.09 | 4 | 203220_s_at | AI951720  | 1.22 | 10 | 1422751_at   | NM_011599 | 1.616 | 11 |
| <b>TLOC1</b>   | C | 1374188_at   | translocation protein 1 (predicted)                                      | AI103194  | 1.47 | 6 | 208942_s_at | BE866511  | 1.79 | 12 | 1455698_at   | AK018223  | 1.495 | 7  |
| <b>TLOC1</b>   | C | 1374188_at   | translocation protein 1 (predicted)                                      | AI103194  | 1.47 | 6 | 208943_s_at | U93239    | 1.59 | 14 | 1455698_at   | BQ175470  | 1.495 | 7  |
| <b>TM4SF4</b>  | B | 1368706_at   | transmembrane 4 superfamily member 4                                     | NM_053785 | 11.6 | 6 | 209937_at   | BC001386  | 15.8 | 14 | 1424962_at   | BC010814  | 9.872 | 17 |
| <b>TM9SF4</b>  |   | 1371647_at   | transmembrane protein TM9SF3 (predicted)                                 | AA963367  | 1.58 | 6 | 212194_s_at | AI418892  | 1.53 | 14 | 1423204_at   | BB367487  | 7.14  | 17 |
| <b>TMOD2</b>   |   | 1369541_at   | tropomodulin 2                                                           | NM_031613 | 1.66 | 4 | 219701_at   | NM_014548 | 1.85 | 10 | 1430153_at   | AK018223  | 11.38 | 17 |
| <b>TMOD2</b>   |   | 1390482_at   | Tropomodulin 2                                                           | BF285511  | 2.06 | 6 | 219701_at   | NM_014548 | 1.85 | 10 | 1431326_a_at | AK017072  | 5.517 | 15 |
| <b>TMOD2</b>   |   | 1393418_at   | tropomodulin 2                                                           | BF567833  | 1.93 | 4 | 219701_at   | NM_014548 | 1.85 | 10 | 1435060_at   | BB667124  | 3.117 | 15 |
| <b>TPD52</b>   | B | 1391880_at   | Tumor protein D52 (predicted)                                            | AA893670  | 1.65 | 2 | 201688_s_at | BG389015  | 5.99 | 14 | 1419493_a_at | BC002036  | 1.967 | 15 |
| <b>TPD52</b>   | B | 1391880_at   | Tumor protein D52 (predicted)                                            | AA893670  | 1.65 | 2 | 201689_s_at | BE974098  | 3.95 | 14 | 1419493_a_at | BC002036  | 1.967 | 15 |
| <b>TPD52</b>   | B | 1391880_at   | Tumor protein D52 (predicted)                                            | AA893670  | 1.65 | 2 | 201690_s_at | AA524023  | 3.92 | 14 | 1419493_a_at | BC002036  | 1.967 | 15 |
| <b>TPD52</b>   | B | 1391880_at   | Tumor protein D52 (predicted)                                            | AA893670  | 1.65 | 2 | 201691_s_at | NM_005079 | 2.04 | 14 | 1419493_a_at | BC002036  | 1.967 | 15 |
| <b>TRIB1</b>   | C | 1389987_at   | tribbles homolog 1 (Drosophila)                                          | AI511059  | 4.96 | 6 | 202241_at   | NM_025195 | 3.48 | 10 | 1424881_at   | AV237242  | 3.652 | 15 |
| <b>TRIB1</b>   | C | 1371019_at   | tribbles homolog 1 (Drosophila)                                          | BM387324  | 2.08 | 4 | 202241_at   | NM_025195 | 3.48 | 10 | 1424880_at   | AV237242  | 4.079 | 15 |
| <b>TSN</b>     |   | 1367728_at   | translin                                                                 | NM_021762 | 1.88 | 6 | 201513_at   | AI659180  | 1.62 | 12 | 1448516_at   | BB818311  | 2.941 | 17 |
| <b>TSN</b>     |   | 1367728_at   | translin                                                                 | NM_021762 | 1.88 | 6 | 201504_s_at | AI435302  | 1.44 | 10 | 1448516_at   | BB818311  | 2.941 | 17 |
| <b>TSN</b>     |   | 1367728_at   | translin                                                                 | NM_021762 | 1.88 | 6 | 201515_s_at | NM_004622 | 1.35 | 12 | 1448516_at   | BB818311  | 2.941 | 17 |
| <b>TSPYL4</b>  | A | 1372381_at   | TSPY-like 4                                                              | BM383457  | 1.84 | 0 | 212928_at   | AL050331  | 1.69 | 8  | 1424029_at   | BC017540  | 1.556 | 13 |
| <b>TSPYL4</b>  | A | 1390097_at   | TSPY-like 4 (predicted)                                                  | BI281738  | 1.92 | 0 | 212928_at   | AL050331  | 1.69 | 8  | 1424029_at   | BC017540  | 1.556 | 13 |
| <b>TXNDC1</b>  | C | 1372067_at   | thioredoxin domain containing 1 (predicted)                              | AI179567  | 1.91 | 2 | 208097_s_at | NM_030755 | 2.45 | 14 | 1437143_a_at | AV310544  | 2.14  | 15 |
| <b>TXNDC1</b>  | C | 1372067_at   | thioredoxin domain containing 1 (predicted)                              | AI179567  | 1.91 | 2 | 209476_at   | AL080080  | 1.68 | 14 | 1437143_a_at | AV310544  | 2.14  | 15 |
| <b>TXNDC1</b>  | C | 1372298_at   | thioredoxin domain containing 4 (endoplasmic reticulum) (predicted)      | BE098766  | 2.43 | 6 | 208959_s_at | BC005374  | 1.96 | 14 | 1423246_at   | BI100077  | 3.851 | 17 |
| <b>TXNL1</b>   | C | 1388862_at   | Thioredoxin-like (32kD)                                                  | AI412143  | 1.47 | 4 | 201588_at   | NM_004786 | 1.3  | 10 | 1435235_at   | BI662855  | 2.469 | 17 |
| <b>TXNL1</b>   | C | 1368936_at   | thioredoxin-like (32kD)                                                  | NM_080887 | 1.44 | 6 | 201588_at   | NM_004786 | 1.3  | 10 | 1435235_at   | BI662855  | 2.469 | 17 |
| <b>TXNL1</b>   | C | 1380191_s_at | thioredoxin-like (32kD)                                                  | BF555110  | 1.37 | 6 | 201588_at   | NM_004786 | 1.3  | 10 | 1435235_at   | BI662855  | 2.469 | 17 |
| <b>TXNL1</b>   | C | 1391789_at   | thioredoxin-like (32kD)                                                  | BF555110  | 1.89 | 6 | 201588_at   | NM_004786 | 1.3  | 10 | 1437905_at   | AV106191  | 1.883 | 13 |
| <b>UBL3</b>    | B | 1374413_at   | ubiquitin-like 3 (predicted)                                             | BM386522  | 1.8  | 4 | 201534_s_at | AF044221  | 2.11 | 14 | 1423461_a_at | AV328436  | 1.907 | 15 |
| <b>UBL3</b>    | B | 1374413_at   | ubiquitin-like 3 (predicted)                                             | BM386522  | 1.8  | 4 | 201535_at   | NM_007106 | 1.48 | 8  | 1423461_a_at | AV328436  | 1.907 | 15 |
| <b>UBQLN2</b>  | C | 1372131_at   | ubiquilin 2 (predicted)                                                  | BF398140  | 1.57 | 2 | 215884_s_at | AK001029  | 1.86 | 10 | 1420844_at   | AV171029  | 2.878 | 17 |
| <b>UBXD2</b>   |   | 1388444_at   | UBX domain containing 2 (predicted)                                      | BI291633  | 1.81 | 6 | 212006_at   | AU149908  | 2.07 | 14 | 1426485_at   | AI788596  | 7.221 | 17 |
| <b>UBXD2</b>   |   | 1388444_at   | UBX domain containing 2 (predicted)                                      | BI291633  | 1.81 | 6 | 212008_at   | N29889    | 2.29 | 14 | 1444057_at   | BB253461  | 1.784 | 13 |
| <b>UFC1</b>    | C | 1371758_at   | Ufm1-conjugating enzyme 1                                                | BM986259  | 1.69 | 6 | 217797_at   | NM_016406 | 1.73 | 14 | 1416327_at   | NM_025388 | 2.16  | 17 |
| <b>USP47</b>   | C | 1399036_at   | ubiquitin specific protease 47 (predicted)                               | AA964374  | 1.53 | 4 | 221518_s_at | BE966019  | 1.21 | 8  | 1426976_at   | BC069271  | 1.501 | 11 |
| <b>VAT1</b>    |   | 1374905_at   | Vesicle amine transport protein 1 homolog (T californica)                | AA925303  | 1.57 | 6 | 208626_s_at | BC001913  | 1.82 | 14 | 1438165_x_at | BB559097  | 2.079 | 13 |
| <b>VLDLR</b>   |   | 1369098_at   | very low density lipoprotein receptor                                    | NM_013155 | 2.13 | 4 | 209822_s_at | L22431    | 4.46 | 14 | 1438258_at   | BE647363  | 1.907 | 11 |
| <b>VLDLR</b>   |   | 1387455_a_at | very low density lipoprotein receptor                                    | NM_013155 | 2.02 | 4 | 209822_s_at | L22431    | 4.46 | 14 | 1438258_at   | BE647363  | 1.907 | 11 |

|        |   |            |                                                                   |           |      |    |             |           |      |    |              |           |       |    |
|--------|---|------------|-------------------------------------------------------------------|-----------|------|----|-------------|-----------|------|----|--------------|-----------|-------|----|
| WDR6   | C | 1373399_at | WD repeat domain 6 (predicted)                                    | BI291997  | 2.82 | 4  | 217734_s_at | NM_018031 | 1.62 | 10 | 1455940_x_at | BB453609  | 2.105 | 17 |
| WFS1   |   | 1387356_at | Wolfram syndrome 1                                                | NM_031823 | 3.45 | 6  | 202908_at   | NM_006005 | 2.27 | 14 | 1448411_at   | NM_011716 | 4.078 | 17 |
| WFS1   |   | 1368839_at | Wolfram syndrome 1                                                | NM_031823 | 3    | 6  | 202908_at   | NM_006005 | 2.27 | 14 | 1448411_at   | NM_011716 | 4.078 | 17 |
| WNT4   | B | 1368641_at | wingless-related MMTV integration site 4                          | NM_053402 | 7.47 | 4  | 208606_s_at | NM_030761 | 15.1 | 14 | 1450782_at   | NM_009523 | 3.741 | 15 |
| YWHAQ  | C | 1370168_at | tyrosine 3-monooxygenase/tryptophan 5-monooxygenase activation pr | BF281342  | 1.72 | -2 | 200693_at   | NM_006826 | 1.75 | 10 | 1437608_x_at | BB414446  | 3.509 | 17 |
| YWHAQ  | C | 1387862_at | tyrosine 3-monooxygenase/tryptophan 5-monooxygenase activation pr | BF281342  | 1.58 | -2 | 212426_s_at | BF033313  | 1.95 | 10 | 1445341_at   | BG074147  | 1.971 | 15 |
| ZNF451 | C | 1389047_at | Zinc finger protein 451                                           | AI009167  | 2.17 | 4  | 212557_at   | AB011148  | 1.42 | 10 | 1456415_at   | BI083675  | 2.433 | 17 |
| ZNF451 | C | 1389047_at | Zinc finger protein 451                                           | AI009167  | 2.17 | 4  | 212557_at   | AB011148  | 1.42 | 10 | 1456350_at   | BI174076  | 1.683 | 15 |

**Islet-abundant and , in rat tissue data set, islet endocrine non-beta (alpha cell) -enriched**

| symbol   | probe set    | gene (Rat)                                                          | Accession | av FC | FCeta sco | probe set   | Accession | av FC | FCeta sco | probe set    | Accession | av FC | FCeta sco |
|----------|--------------|---------------------------------------------------------------------|-----------|-------|-----------|-------------|-----------|-------|-----------|--------------|-----------|-------|-----------|
| ANXA4    | 1368908_at   | annexin A4                                                          | NM_024155 | 1.45  | 4         | 201301_s_at | BC000182  | 3.74  | 10        | 1421223_a_at | NM_013471 | 1.689 | 9         |
| ANXA4    | 1389305_at   | annexin A4                                                          | BM385237  | 1.34  | 2         | 201302_at   | NM_001153 | 3.69  | 8         | 1421223_a_at | NM_013471 | 1.689 | 9         |
| ALCAM    | 1370043_at   | activated leukocyte cell adhesion molecule                          | NM_031753 | 1.55  | -2        | 201951_at   | BF242905  | 9.6   | 14        | 1426301_at   | U95030    | 2.038 | 15        |
| ALCAM    | 1375263_at   | Activated leukocyte cell adhesion molecule                          | BI296498  | 1.41  | 4         | 201952_at   | AA156721  | 5.39  | 14        | 1426301_at   | U95030    | 2.038 | 15        |
| ABCC8    | 1369632_a_at | ATP-binding cassette, sub-family C (CFTR/MRP), member 8             | AB052294  | 2.69  | 4         | 210246_s_at | AF087138  | 22.3  | 14        | 1457066_at   | BF466569  | 9.954 | 17        |
| ABCC8    | 1369632_a_at | ATP-binding cassette, sub-family C (CFTR/MRP), member 8             | AB052294  | 2.69  | 4         | 210246_s_at | AF087138  | 22.3  | 14        | 1455765_a_at | BB515948  | 3.333 | 17        |
| BTG3     | 1368072_at   | B-cell translocation gene 3                                         | NM_019290 | 5.1   | 4         | 213134_x_at | AI765445  | 6.48  | 14        | 1449007_at   | NM_009770 | 2.914 | 17        |
| BTG3     | 1368072_at   | B-cell translocation gene 3                                         | NM_019290 | 5.1   | 4         | 205548_s_at | NM_006806 | 5.44  | 14        | 1449007_at   | NM_009770 | 2.914 | 17        |
| BCLAF1   | 1373868_at   | BCL2-associated transcription factor 1 (predicted)                  | AI717547  | 1.8   | 4         | 214499_s_at | AF249273  | 2.05  | 8         | 1438089_a_at | BE853331  | 3.675 | 17        |
| BCLAF1   | 1373868_at   | BCL2-associated transcription factor 1 (predicted)                  | AI717547  | 1.8   | 4         | 201083_s_at | AA740754  | 1.79  | 12        | 1438089_a_at | BE853331  | 3.675 | 17        |
| BCLAF1   | 1373868_at   | BCL2-associated transcription factor 1 (predicted)                  | AI717547  | 1.8   | 4         | 201084_s_at | NM_014739 | 1.43  | 12        | 1438089_a_at | BE853331  | 3.675 | 17        |
| MTHFD2   | 1372808_at   | Bifunctional methylenetetrahydrofolate dehydrogenase/cyclohydrolase | AW251324  | 2.75  | 4         | 201761_at   | NM_006636 | 2.44  | 10        | 1419254_at   | BG076333  | 2.997 | 17        |
| MTHFD2   | 1372808_at   | Bifunctional methylenetetrahydrofolate dehydrogenase/cyclohydrolase | AW251324  | 2.75  | 4         | 201761_at   | NM_006636 | 2.44  | 10        | 1419253_at   | BG076333  | 2.726 | 17        |
| MTHFD2   | 1372808_at   | Bifunctional methylenetetrahydrofolate dehydrogenase/cyclohydrolase | AW251324  | 2.75  | 4         | 201761_at   | NM_006636 | 2.44  | 10        | 1436704_x_at | AV215673  | 1.748 | 13        |
| CDH1     | 1386947_at   | cadherin 1                                                          | NM_031334 | 8.43  | 4         | 201131_s_at | NM_004360 | 9.41  | 8         | 1448261_at   | NM_009864 | 1.876 | 13        |
| CDH1     | 1386947_at   | cadherin 1                                                          | NM_031334 | 8.43  | 4         | 201130_s_at | L08599    | 5     | 12        | 1448261_at   | NM_009864 | 1.876 | 13        |
| CPD      | 1369215_a_at | carboxypeptidase D                                                  | NM_012836 | 1.4   | 4         | 201942_s_at | D85390    | 4.1   | 12        | 1418018_at   | NM_007754 | 3.633 | 17        |
| CPD      | 1369215_a_at | carboxypeptidase D                                                  | NM_012836 | 1.4   | 4         | 201940_at   | AA897514  | 4.05  | 14        | 1418018_at   | NM_007754 | 3.633 | 17        |
| CPD      | 1369215_a_at | carboxypeptidase D                                                  | NM_012836 | 1.4   | 4         | 201941_at   | BE349147  | 3.88  | 14        | 1418018_at   | NM_007754 | 3.633 | 17        |
| CPD      | 1369215_a_at | carboxypeptidase D                                                  | NM_012836 | 1.4   | 4         | 201943_s_at | NM_001304 | 4.61  | 14        | 1447392_s_at | BB710395  | 2.409 | 15        |
| CBX6     | 1374703_at   | Chromobox homolog 6                                                 | BI304209  | 1.48  | 0         | 202047_s_at | AI458128  | 2.33  | 10        | 1424407_s_at | BC019942  | 1.524 | 7         |
| CBX6     | 1375307_at   | chromobox homolog 6 (predicted)                                     | BI275772  | 1.62  | 0         | 202048_s_at | NM_014292 | 1.74  | 10        | 1424407_s_at | BC019942  | 1.524 | 7         |
| CHGB     | 1368034_at   | chromogranin B                                                      | NM_012526 | 13.9  | 2         | 204260_at   | NM_001819 | 31.8  | 14        | 1415885_at   | NM_007694 | 10.9  | 17        |
| DAP      | 1369941_at   | death-associated protein                                            | NM_022526 | 2.15  | 2         | 201095_at   | NM_004394 | 2.85  | 14        | 1451112_s_at | BC024876  | 1.964 | 15        |
| DPP6     | 1376183_at   | Dipeptidylpeptidase 6                                               | AI101484  | 3.21  | 0         | 207789_s_at | NM_001936 | 2.94  | 10        | 1439748_at   | AV328546  | 5.194 | 17        |
| DPP6     | 1369390_a_at | dipeptidylpeptidase 6                                               | NM_022850 | 2.57  | 2         | 207789_s_at | NM_001936 | 2.94  | 10        | 1439748_at   | AV328546  | 5.194 | 17        |
| DUSP8    | 1372385_at   | dual specificity phosphatase 8 (predicted)                          | AA957292  | 1.26  | 4         | 206374_at   | NM_004420 | 1.42  | 8         | 1418714_at   | NM_008748 | 2.079 | 13        |
| DYRK3    | 1383649_a_at | Dual-specificity tyrosine-(Y)-phosphorylation regulated kinase 3    | BI291080  | 1.92  | 2         | 210151_s_at | AF186773  | 1.42  | 12        | 1424229_at   | BC006704  | 2.015 | 15        |
| EGR1     | 1368321_at   | early growth response 1                                             | NM_012551 | 4.86  | 4         | 201694_s_at | NM_001964 | 4.72  | 14        | 1417065_at   | NM_007913 | 4.923 | 17        |
| EGR1     | 1368321_at   | early growth response 1                                             | NM_012551 | 4.86  | 4         | 201693_s_at | AV733950  | 2.23  | 14        | 1417065_at   | NM_007913 | 4.923 | 17        |
| EPM2AIP1 | 1372568_at   | EPM2A (laforin) interacting protein 1 (predicted)                   | AI411270  | 1.73  | 4         | 202909_at   | NM_014805 | 1.58  | 10        | 1434106_at   | AV340515  | 4.85  | 17        |
| EPM2AIP1 | 1372568_at   | EPM2A (laforin) interacting protein 1 (predicted)                   | AI411270  | 1.73  | 4         | 202909_at   | NM_014805 | 1.58  | 10        | 1425624_at   | BC018474  | 4.455 | 15        |
| EPM2AIP1 | 1389100_at   | EPM2A (laforin) interacting protein 1 (predicted)                   | BF409831  | 2.76  | 4         | 202909_at   | NM_014805 | 1.58  | 10        | 1454835_at   | AV340515  | 1.908 | 15        |
| EPM2AIP1 | 1372568_at   | EPM2A (laforin) interacting protein 1 (predicted)                   | AI411270  | 1.73  | 4         | 202909_at   | NM_014805 | 1.58  | 10        | 1434105_at   | AV340515  | 1.766 | 13        |
| GCG      | 1369888_at   | glucagon                                                            | NM_012707 | 39.6  | 4         | 206422_at   | NM_002054 | 60    | 14        | 1425952_a_at | AF276754  | 47.58 | 17        |
| GNAS     | 1387906_a_at | GNAS complex locus                                                  | AF107845  | 8.34  | 2         | 217057_s_at | AF107846  | 26.1  | 14        | 1443007_at   | AW545941  | 1.858 | 13        |
| GNAS     | 1387906_a_at | GNAS complex locus                                                  | AF107845  | 8.34  | 2         | 214157_at   | AA401492  | 14.9  | 14        | 1427789_s_at | AI561892  | 4.001 | 17        |

|                  |              |                                                                          |                     |      |    |             |           |      |    |              |           |       |    |
|------------------|--------------|--------------------------------------------------------------------------|---------------------|------|----|-------------|-----------|------|----|--------------|-----------|-------|----|
| <b>GNAS</b>      | 1387906_a_at | GNAS complex locus                                                       | AF107845            | 8.34 | 2  | 211858_x_at | AF088184  | 2.99 | 14 | 1427789_s_at | AI561892  | 4.001 | 17 |
| <b>GNAS</b>      | 1387906_a_at | GNAS complex locus                                                       | AF107845            | 8.34 | 2  | 200981_x_at | NM_016592 | 2.9  | 14 | 1427789_s_at | AI561892  | 4.001 | 17 |
| <b>GNAS</b>      | 1387906_a_at | GNAS complex locus                                                       | AF107845            | 8.34 | 2  | 212273_x_at | AI591100  | 2.84 | 14 | 1427789_s_at | AI561892  | 4.001 | 17 |
| <b>GNAS</b>      | 1387906_a_at | GNAS complex locus                                                       | AF107845            | 8.34 | 2  | 200780_x_at | NM_000516 | 2.83 | 14 | 1427789_s_at | AI561892  | 4.001 | 17 |
| <b>GNAS</b>      | 1387906_a_at | GNAS complex locus                                                       | AF107845            | 8.34 | 2  | 214548_x_at | AF064092  | 2.75 | 14 | 1443375_at   | BM239335  | 1.976 | 17 |
| <b>GNAS</b>      | 1369897_s_at | GNAS complex locus /// XLas protein                                      | BI277035            | 1.4  | 2  | 217673_x_at | AA650558  | 2.29 | 14 | 1444767_at   | AV253089  | 2.531 | 17 |
| <b>GCH1</b>      | 1387221_at   | GTP cyclohydrolase 1                                                     | NM_024356           | 5.85 | 4  | 204224_s_at | NM_000161 | 18.8 | 14 | 1429692_s_at | BB698398  | 9.306 | 17 |
| <b>GCH1</b>      | 1373513_at   | GTP cyclohydrolase 1                                                     | AI012419            | 6.23 | 4  | 204224_s_at | NM_000161 | 18.8 | 14 | 1420499_at   | NM_008102 | 3.857 | 17 |
| <b>GCH1</b>      | 1380230_at   | GTP cyclohydrolase 1                                                     | AI639457            | 4.62 | 4  | 204224_s_at | NM_000161 | 18.8 | 14 | 1420499_at   | NM_008102 | 3.857 | 17 |
| <b>GCH1</b>      | 1368503_at   | GTP cyclohydrolase 1                                                     | NM_024356           | 1.89 | 4  | 204224_s_at | NM_000161 | 18.8 | 14 | 1420499_at   | NM_008102 | 3.857 | 17 |
| <b>GNAI1</b>     | 1387505_at   | guanine nucleotide binding protein, alpha inhibiting 1                   | NM_013145           | 1.41 | 0  | 209576_at   | AL049933  | 3.43 | 12 | 1427510_at   | U38501    | 2.084 | 17 |
| <b>GNAI1</b>     | 1387505_at   | guanine nucleotide binding protein, alpha inhibiting 1                   | NM_013145           | 1.41 | 0  | 209576_at   | AL049933  | 3.43 | 12 | 1427510_at   | U38501    | 2.084 | 17 |
| <b>IER2</b>      | 1372389_at   | immediate early response 2                                               | BF420059            | 2.06 | 4  | 202081_at   | NM_004907 | 3.84 | 12 | 1416442_at   | NM_010499 | 3.838 | 15 |
| <b>IGSF1</b>     | 1379252_at   | Immunoglobulin superfamily, member 4A                                    | AW522833            | 1.42 | -2 | 209030_s_at | NM_014333 | 4.28 | 14 | 1440412_at   | BB312687  | 1.857 | 15 |
| <b>IGSF1</b>     | 1379252_at   | Immunoglobulin superfamily, member 4A                                    | AW522833            | 1.42 | -2 | 209031_at   | AL519710  | 3.59 | 12 | 1440412_at   | BB312687  | 1.857 | 15 |
| <b>IGSF1</b>     | 1379252_at   | Immunoglobulin superfamily, member 4A                                    | AW522833            | 1.42 | -2 | 209032_s_at | AF132811  | 2.4  | 14 | 1440412_at   | BB312687  | 1.857 | 15 |
| <b>IRS2</b>      | 1371091_at   | insulin receptor substrate 2                                             | not on RG230A array |      |    | 209184_s_at | BF700086  | 2.44 | 14 | 1443969_at   | BE199054  | 10.08 | 17 |
| <b>IRS2</b>      | 1397999_at   | Insulin receptor substrate 2                                             | not on RG230A array |      |    | 209185_s_at | AF073310  | 1.51 | 12 | 1443969_at   | BE199054  | 10.08 | 17 |
| <b>ISL1</b>      | 1369681_at   | ISL1 transcription factor, LIM/homeodomain 1                             | NM_017339           | 1.5  | 2  | 206104_at   | NM_002202 | 26.9 | 14 | 1450723_at   | BQ176915  | 20.03 | 17 |
| <b>ISL1</b>      | 1369681_at   | ISL1 transcription factor, LIM/homeodomain 1                             | NM_017339           | 1.5  | 2  | 206104_at   | NM_002202 | 26.9 | 14 | 1422720_at   | BQ176915  | 8.868 | 17 |
| <b>JUNB</b>      | 1387788_at   | Jun-B oncogene                                                           | NM_021836           | 2    | 4  | 201473_at   | NM_002229 | 3.05 | 12 | 1415899_at   | NM_008416 | 2.173 | 15 |
| <b>NDN</b>       | 1371947_at   | necdin (predicted)                                                       | BG671865            | 1.7  | 0  | 209550_at   | U35139    | 1.82 | 12 | 1437853_x_at | BB074430  | 1.908 | 13 |
| <b>NEO1</b>      | 1390468_at   | Neogenin                                                                 | BF397709            | 1.42 | 2  | 204321_at   | NM_002499 | 1.59 | 12 | 1447693_s_at | BB350308  | 2.818 | 17 |
| <b>NFIC</b>      | 1371176_at   | nuclear factor I/C                                                       | AB012233            | 1.35 | 4  | 213298_at   | X12492    | 1.05 | 10 | 1450661_x_at | NM_008688 | 2.342 | 17 |
| <b>NR4A2</b>     | 1387410_at   | nuclear receptor subfamily 4, group A, member 2                          | U72345              | 1.5  | 4  | 216248_s_at | S77154    | 3.27 | 10 | 1455034_at   | BB703394  | 2.905 | 15 |
| <b>NR4A2</b>     | 1387410_at   | nuclear receptor subfamily 4, group A, member 2                          | U72345              | 1.5  | 4  | 204622_x_at | NM_006186 | 2.93 | 10 | 1450749_a_at | NM_013613 | 2.527 | 15 |
| <b>NR4A2</b>     | 1387410_at   | nuclear receptor subfamily 4, group A, member 2                          | U72345              | 1.5  | 4  | 204621_s_at | AI935096  | 2.17 | 12 | 1447863_s_at | BB322941  | 1.991 | 17 |
| <b>NOL5A</b>     | 1368173_at   | nucleolar protein 5                                                      | NM_021754           | 1.78 | 2  | 200874_s_at | BE796327  | 1.57 | 14 | 1450986_at   | BB729616  | 2.348 | 15 |
| <b>PPY</b>       | 1369196_at   | pancreatic polypeptide                                                   | NM_012626           | 4.39 | 4  | 210670_at   | M15788    | 42.4 | 14 | 1420440_at   | NM_008918 | 78.13 | 17 |
| <b>PGBD5</b>     | 1389597_at   | piggyBac transposable element derived 5 (predicted)                      | BI293445            | 1.35 | 0  | 219225_at   | NM_024554 | 1.96 | 8  | 1460570_at   | AV151597  | 1.918 | 15 |
| <b>PCSK1N</b>    | 1367835_at   | proprotein convertase subtilisin/kexin type 1 inhibitor                  | NM_019279           | 9.6  | 2  | 218952_at   | NM_013271 | 10.8 | 14 | 1416965_at   | AF181560  | 5.882 | 15 |
| <b>RYBP</b>      | 1372674_at   | RING1 and YY1 binding protein (predicted)                                | BE107155            | 1.42 | 2  | 201845_s_at | AB029551  | 2.02 | 8  | 1428219_at   | AK010548  | 2.064 | 15 |
| <b>RYBP</b>      | 1372674_at   | RING1 and YY1 binding protein (predicted)                                | BE107155            | 1.42 | 2  | 201846_s_at | NM_012234 | 1.46 | 8  | 1428219_at   | AK010548  | 2.064 | 15 |
| <b>RYBP</b>      | 1372674_at   | RING1 and YY1 binding protein (predicted)                                | BE107155            | 1.42 | 2  | 201844_s_at | W84482    | 1.29 | 10 | 1428219_at   | AK010548  | 2.064 | 15 |
| <b>SCN3B</b>     | 1370850_at   | sodium channel, voltage-gated, type III, beta                            | AA685184            | 1.75 | 0  | 204722_at   | AW007335  | 1.28 | 10 | 1426328_a_at | AY049036  | 1.972 | 15 |
| <b>SLC7A1</b>    | 1368391_at   | solute carrier family 7 (cationic amino acid transporter, y+ system), me | AB066224            | 2.29 | 4  | 206566_at   | NM_003045 | 1.69 | 14 | 1454992_at   | BB264620  | 1.915 | 15 |
| <b>SLC7A1</b>    | 1368392_at   | solute carrier family 7 (cationic amino acid transporter, y+ system), me | AB066224            | 1.42 | 4  | 212295_s_at | AA148507  | 1.78 | 12 | 1454992_at   | BB264620  | 1.915 | 15 |
| <b>TIPARP</b>    | 1374446_at   | TCDD-inducible poly(ADP-ribose) polymerase (predicted)                   | AI179464            | 1.49 | 4  | 212665_at   | AL556438  | 2.52 | 12 | 1452160_at   | BB707122  | 8.334 | 17 |
| <b>TIPARP</b>    | 1374446_at   | TCDD-inducible poly(ADP-ribose) polymerase (predicted)                   | AI179464            | 1.49 | 4  | 212665_at   | AL556438  | 2.52 | 12 | 1452161_at   | BB707122  | 2.728 | 13 |
| <b>TIPARP</b>    | 1374446_at   | TCDD-inducible poly(ADP-ribose) polymerase (predicted)                   | AI179464            | 1.49 | 4  | 212665_at   | AL556438  | 2.52 | 12 | 1426721_s_at | BB707122  | 2.648 | 17 |
| <b>TRIB3</b>     | 1386321_s_at | tribbles homolog 3 (Drosophila)                                          | H31287              | 3.09 | 4  | 218145_at   | NM_021158 | 1.62 | 12 | 1456225_x_at | BB508622  | 2.256 | 15 |
| <b>TRIB3</b>     | 1370695_s_at | tribbles homolog 3 (Drosophila)                                          | AB020967            | 2.41 | 4  | 218145_at   | NM_021158 | 1.62 | 12 | 1456225_x_at | BB508622  | 2.256 | 15 |
| <b>TRIB3</b>     | 1370694_at   | tribbles homolog 3 (Drosophila)                                          | AB020967            | 1.57 | 4  | 218145_at   | NM_021158 | 1.62 | 12 | 1456225_x_at | BB508622  | 2.256 | 15 |
| <b>TNFRSF12A</b> | 1371785_at   | tumor necrosis factor receptor superfamily, member 12a                   | BI303379            | 1.91 | 2  | 218368_s_at | NM_016639 | 1.51 | 12 | 1418572_x_at | NM_013749 | 4.485 | 17 |
| <b>TACSTD1</b>   | 1388199_at   | tumor-associated calcium signal transducer 1                             | BG376410            | 10.2 | 2  | 201839_s_at | NM_002354 | 10.7 | 12 | 1447899_x_at | AV099587  | 3.826 | 17 |
| <b>WBP11</b>     | 1372575_at   | WW domain binding protein 11 (predicted)                                 | AA892364            | 1.67 | 4  | 217822_at   | NM_016312 | 1.22 | 10 | 1447401_at   | AW909375  | 1.908 | 15 |
| <b>ZBTB10</b>    | 1376125_at   | Zinc finger and BTB domain containing 10                                 | BI289112            | 1.8  | 4  | 219312_s_at | NM_023929 | 2.16 | 10 | 1436067_at   | BG068032  | 2.246 | 17 |
| <b>ZBTB10</b>    | 1387453_at   | zinc finger and BTB domain containing 10                                 | NM_024489           | 1.88 | 4  | 219312_s_at | NM_023929 | 2.16 | 10 | 1436068_at   | BG068032  | 1.62  | 17 |
| <b>ZKSCAN1</b>   | 1373106_at   | Zinc finger protein 36, C3H type-like 2                                  | AI178069            | 1.47 | 2  | 214900_at   | AC004522  | 1.18 | 12 | 1452519_a_at | X14678    | 1.701 | 15 |
| <b>ZKSCAN1</b>   | 1389851_at   | zinc finger protein 36, C3H type-like 2 (predicted)                      | AA943730            | 1.37 | 6  | 214670_at   | AA653300  | 1.81 | 12 | 1452519_a_at | X14678    | 1.701 | 15 |

|         |            |                                        |           |      |   |             |           |      |    |              |           |       |    |
|---------|------------|----------------------------------------|-----------|------|---|-------------|-----------|------|----|--------------|-----------|-------|----|
| ZDHHC14 | 1372989_at | Zinc finger, DHHC domain containing 14 | BI296586  | 1.39 | 2 | 219247_s_at | NM_024630 | 1.24 | 12 | 1438151_x_at | BB544336  | 11.38 | 17 |
| ZDHHC14 | 1372989_at | Zinc finger, DHHC domain containing 14 | BI296586  | 1.39 | 2 | 219247_s_at | NM_024630 | 1.24 | 12 | 1437614_x_at | AV223474  | 1.705 | 15 |
| SST     | 1367762_at | somatostatin                           | NM_012659 | 17.1 | 4 | 213921_at   | NM_001048 | 57.4 | 14 | 1417954_at   | NM_009215 | 22.47 | 17 |

**Islet-abundant and , in human tissue data set, pancreatic duct cell-enriched as compared to beta cell fraction**

| symbol | probe set  | gene (Rat)                                                    | Accession | av FCeta sco | probe set | Accession   | av FCeta sco | probe set | Accession | av FCeta sco |           |       |    |
|--------|------------|---------------------------------------------------------------|-----------|--------------|-----------|-------------|--------------|-----------|-----------|--------------|-----------|-------|----|
| BACE2  | 1377390_at | beta-site APP-cleaving enzyme 2                               | BG381587  | 1.74         | 4         | 217867_x_at | NM_012105    | 1.74      | 8         | 1435581_at   | BE947462  | 7.756 | 17 |
| BACE2  | 1377390_at | beta-site APP-cleaving enzyme 2                               | BG381587  | 1.74         | 4         | 217867_x_at | NM_012105    | 1.74      | 8         | 1437846_x_at | BB348062  | 7.746 | 17 |
| BACE2  | 1377390_at | beta-site APP-cleaving enzyme 2                               | BG381587  | 1.74         | 4         | 217867_x_at | NM_012105    | 1.74      | 8         | 1416673_at   | NM_019517 | 5.473 | 17 |
| BACE2  | 1377390_at | beta-site APP-cleaving enzyme 2                               | BG381587  | 1.74         | 4         | 217867_x_at | NM_012105    | 1.74      | 8         | 1438645_x_at | BB558905  | 3.612 | 15 |
| CXCL1  | 1387316_at | chemokine (C-X-C motif) ligand 1                              | NM_030845 | 6.38         | 6         | 204470_at   | NM_001511    | 2.7       | 8         | 1457644_s_at | BB554288  | 14.79 | 17 |
| CXCL1  | 1387316_at | chemokine (C-X-C motif) ligand 1                              | NM_030845 | 6.38         | 6         | 204470_at   | NM_001511    | 2.7       | 8         | 1441855_x_at | BB554288  | 11.86 | 17 |
| CXCL1  | 1387316_at | chemokine (C-X-C motif) ligand 1                              | NM_030845 | 6.38         | 6         | 204470_at   | NM_001511    | 2.7       | 8         | 1419209_at   | NM_008176 | 5.93  | 17 |
| DUSP1  | 1368147_at | dual specificity phosphatase 1                                | BE110108  | 1.84         | 4         | 201044_x_at | AA530892     | 3.09      | 10        | 1448830_at   | NM_013642 | 3.849 | 17 |
| DUSP1  | 1368146_at | dual specificity phosphatase 1                                | BE110108  | 1.77         | 4         | 201041_s_at | NM_004417    | 2.16      | 10        | 1448830_at   | NM_013642 | 3.849 | 17 |
| KLF6   | 1387060_at | Kruppel-like factor 6 (core promoter element binding protein) | NM_031642 | 5.62         | 6         | 208961_s_at | AB017493     | 3.47      | 10        | 1418280_at   | NM_011803 | 1.794 | 15 |
| KLF6   | 1388986_at | Kruppel-like factor 6 (Core promoter element binding protein) | AI598339  | 3.76         | 4         | 208961_s_at | AB017493     | 3.47      | 10        | 1433508_at   | AV025472  | 1.903 | 13 |
| RIPK4  | 1389648_at | Receptor-interacting serine-threonine kinase 4 (predicted)    | AI170382  | 3.17         | 4         | 221215_s_at | NM_020639    | 1.8       | 10        | 1418488_s_at | AF302127  | 3.269 | 17 |
| RIPK4  | 1389648_at | Receptor-interacting serine-threonine kinase 4 (predicted)    | AI170382  | 3.17         | 4         | 221215_s_at | NM_020639    | 1.8       | 10        | 1418487_at   | AF302127  | 2.111 | 11 |
